# Supplementary material for: Direct use of allylic alcohols for palladium-catalyzed synthesis of 3-allylbenzo[b]thiophenes, benzofurans and indoles in aqueous media
Source: Royal Society of Chemistry journal article supplement (doi:10.1039/c5ra05263g), 2015-01-01

**Direct use of allyl alcohols for palladium  
catalyzed synthesis of 3-allylbenzo[*b*]thiophenes,  
benzofuranes and indoles in aqueous media.**

Yogesh Daulat Dhage, Tsukasa Shirai, Miho Arima, Arisa Nakazima, Hidemasa Hikawa, Isao Azumaya, Taichi Kusakabe, Keisuke Takahashi, and Keisuke Kato\*

Faculty of Pharmaceutical Sciences, Toho University, 2-2-1 Miyama, Funabashi, Chiba 274-8510, Japan.

**Supporting Information**

## Table of Contents

|                                                                                                                    |     |
|--------------------------------------------------------------------------------------------------------------------|-----|
| 1. General Information -----                                                                                       | S1  |
| 2. Preparation of substrates -----                                                                                 | S1  |
| 3. Typical experimental procedure for the allylative cyclization reaction<br>and analytical data of products ----- | S3  |
| 4. References -----                                                                                                | S13 |
| 5. $^1\text{H}$ and $^{13}\text{C}$ NMR spectra -----                                                              | S14 |

## 1. General Information.

All melting points were determined on a microscopic melting point apparatus and are uncorrected.  $^1\text{H}$  NMR and  $^{13}\text{C}$  NMR spectra were recorded on a 400 MHz ( $^1\text{H}$  NMR) and 100 MHz ( $^{13}\text{C}$  NMR) spectrometer using  $\text{CDCl}_3$  as solvent and TMS as internal standard. Coupling constants ( $J$ ) are reported in hertz (Hz), and spin multiplicities are presented by the following symbols: s (singlet), br-s (broad singlet), d (doublet), br-d (broad doublet), t (triplet), q (quartet), quint (quintet) and m (multiplet). High resolution mass spectra were obtained using a high resolution EI or ESI-TOF mass spectrometer. Infrared spectra (IR) were recorded on a FT-IR spectrophotometer and are reported as wavelength numbers ( $\text{cm}^{-1}$ ). All evaporations were performed under reduced pressure. For column chromatography, silica gel (63 - 200  $\mu\text{m}$ ) was employed.

## 2. Preparation of substrates.

(*o*-alkynylphenyl) (methoxymethyl) sulfide **15** and 2-Alkynyl-*N*-tosylaniline **24** were prepared according to the published procedure.<sup>1a, f</sup> The substrate **1**, **2**, **3**, **17** and **22** were known compounds.<sup>1a-e</sup>

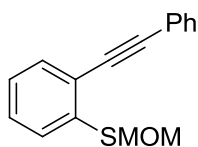

Methoxymethyl 2-(phenylethynyl)phenyl sulfide (**1**)<sup>1a</sup>

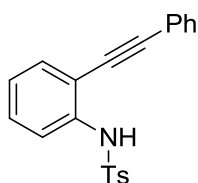

4-Methyl-*N*-{2-(phenylethynyl)phenyl}benzenesulfonamide (**2**)<sup>1b</sup>

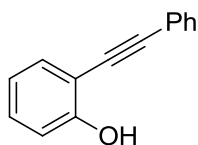

2-(2-Phenylethynyl)-phenol (**3**)<sup>1c</sup>

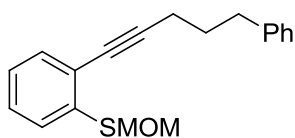

Methoxymethyl 2-(5-phenylpent-1-yn-1-yl) phenyl sulfide (**15**)

To a mixture of 2-iodophenyl methoxymethyl sulfide<sup>1a</sup> (280 mg, 1.0 mmol),  $(\text{PPh}_3)_2\text{PdCl}_2$  (14.0 mg, 0.02 mmol), and CuI (7.6 mg, 0.04 mmol) in triethylamine (7 ml) under argon was added 5-phenyl-1-pentyne (216.3 mg, 1.5 mmol). The reaction mixture was stirred for 4.5 at 50°C. The mixture was diluted with ether, washed with saturated aqueous ammonium chloride, water and brine and dried over  $\text{Mg}_2\text{SO}_4$ . The crude product was purified by flash chromatography using hexane / ether (30 / 1) as eluent to obtain **15** in 86% yield (254.3 mg).

yellow oil,  $^1\text{H-NMR}$  (400 MHz,  $\text{CDCl}_3$ )  $\delta$  1.96 (2H, quint,  $J = 6.8$  Hz), 2.50 (2H, t,  $J = 6.8\text{Hz}$ ), 2.85 (2H, t,  $J = 7.6\text{Hz}$ ), 3.44 (3H, s), 5.05 (2H, s), 7.20-7.29 (7H, m), 7.20-7.29 (7H, m) 7.38-7.40 (1H, m), 7.54-7.56 (1H, m);  $^{13}\text{C-NMR}$  (100 MHz,  $\text{CDCl}_3$ )  $\delta$  19.1, 30.4, 34.8, 56.1, 76.2, 79.1, 96.1, 123.8, 125.7, 125.9, 128.1, 128.3, 128.4 (2C), 128.6 (2C), 132.5, 138.7, 141.7; IR (KBr): 2936, 2221, 1603, 1463, 1182, 1085, 751  $\text{cm}^{-1}$ ; HRMS-EI:  $m/z$  [ $\text{M}^+$ ] calcd for  $\text{C}_{19}\text{H}_{20}\text{S}$  : 296.1235 ; found 296.1236

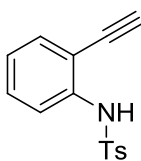

*N*-(2-Ethynyl-phenyl)-4-methyl-benzenesulfonamide (**17**)<sup>1d</sup>

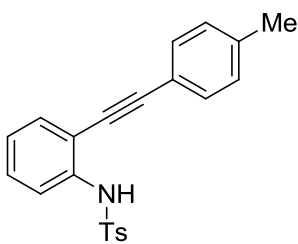

4-Methyl-*N*-{2-(phenylethynyl)phenyl}benzenesulfonamide (**22**)<sup>1e</sup>

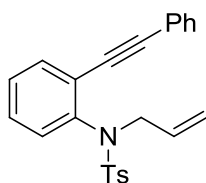

*N*-Allyl -*N*-{2-(phenylethynyl)phenyl}-4-methyl benzenesulfonamide (**24**)

To a solution of **2** (200 mg, 0.576 mmol) in acetone (7 mL) were added allyl bromide (78  $\mu$ L, 0.922 mmol) and  $K_2CO_3$  (119.4 mg, 0.864 mmol) at rt, and the mixture was refluxed for 4.5 h. After removal of solvent, the residue was dissolved in AcOEt. The organic layer was successively washed with water, saturated NaCl aq. solution, dried over  $MgSO_4$  and concentrated. The residue was purified by column chromatography using hexane / AcOEt (20 / 1) as eluent to obtain **24** in 99% yield (220.5 mg).

Colorless prism, mp 83-85  $^{\circ}C$  (Hexane / AcOEt),  $^1H$  NMR (400 MHz,  $CDCl_3$ )  $\delta$  2.21 (3H, s), 4.38 (2H, d,  $J = 6.8$  Hz), 5.05 (1H, dd,  $J = 1.2, 10.0$  Hz), 5.10 (1H, dd,  $J = 1.2, 17.2$  Hz), 5.87 (1H, tdd,  $J = 6.8, 10.0, 17.2$  Hz), 7.08-7.10 (2H, m), 7.26-7.34 (8H, m), 7.48-7.50 (1H, m), 7.63-7.65 (2H, m);  $^{13}C$  NMR (100 MHz,  $CDCl_3$ )  $\delta$  21.4, 53.2, 86.4, 94.2, 118.7, 122.8, 123.7, 127.6 (2C), 128.1, 128.2 (2C), 128.5, 128.8, 129.5 (2C), 131.4 (2C), 132.4, 133.2, 133.4, 137.2, 139.8, 143.2; IR (KBr) 3064, 2979, 2213, 1643, 1598, 1495, 1342, 1164, 752  $cm^{-1}$ ; HRMS-ESI $^+$ :  $m/z$   $[M+Na]^+$  calcd for  $C_{24}H_{21}NNaO_2S$ : 410.1191; found 410.1203.

### 3. Typical experimental procedure for the allylative cyclization reaction.

A 30 mL two-neck round-bottom flask containing a magnetic stirring bar,  $Pd_2(dba)_3 \cdot CHCl_3$  (10.4 mg, 0.01 mmol), TPPMS (14.6 mg, 0.04 mmol) and  $H_2O$  (3 mL) was fitted with a rubber septum and a three-way stopcock connected to a balloon filled with argon. After it was sonicated for 2 min, a solution of alkyne substrate **1-3** (0.4 mmol) and allylic alcohol (0.8 mmol) in dioxane (6 mL) was added to the mixture. The apparatus was purged with argon by pump-filling via the three-way stopcock. The mixture was refluxed for 0.5-2 h. After cooling, the mixture was diluted with ethyl acetate (40 mL) and saturated NaCl aq. (40 mL). The layers were separated and the aqueous layer was extracted with ethyl acetate (30 mL). The combined organic layers were dried over  $Mg_2SO_4$  and concentrated *in vacuo*. The crude product was purified by column chromatography on silica gel. The fraction eluted with hexane/ethyl acetate (150/1) afforded the allylated products **4-6**.

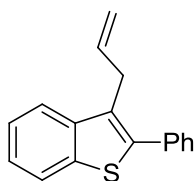

3-Allyl-2-phenylbenzo[*b*]thiophene (**4a**)<sup>2</sup>

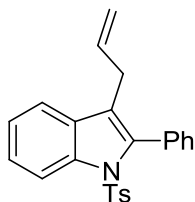

3-Allyl-2-phenyl-1-tosyl-1*H*-indole (**5a**): 98% Yield, White solid, mp 75-77 °C, <sup>1</sup>H NMR (400 MHz, CDCl<sub>3</sub>) δ 2.29 (3H, s), 3.19 (2H, dt, *J* = 2.0, 5.2 Hz), 4.58 (1H, dq, *J* = 2.0, 17.2 Hz), 4.89 (1H, dq, *J* = 1.6, 10.4 Hz), 5.82-5.89 (1H, m), 7.05 (2H, d, *J* = 8.8 Hz), 7.26-7.29 (3H, m), 7.34-7.43 (7H, m), 8.32 (1H, d, *J* = 8 Hz); <sup>13</sup>C NMR (100 MHz, CDCl<sub>3</sub>) δ 21.5, 28.5, 115.5, 116.5, 119.5, 121.5, 124.0, 125.0, 126.8, 127.4, 128.6, 129.1, 131.0, 131.1, 131.2, 134.8, 135.8, 137.5, 137.6, 144.4; IR (KBr) 3057, 2978, 2882, 1597, 1452, 1364, 1176, 750, 702, 665, 579, 544 cm<sup>-1</sup>; HRMS-EI: *m/z* [M<sup>+</sup>] calcd for C<sub>24</sub>H<sub>21</sub>NO<sub>2</sub>S : 387.1293; found 387.1294.

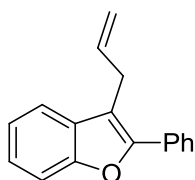

3-Allyl-2-phenylbenzofuran (**6a**)<sup>3</sup>

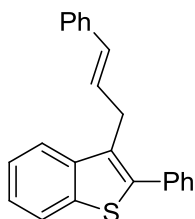

3-Cinnamyl-2-phenylbenzo[*b*]thiophene (**4b**): 91% Yield, Yellow oil, <sup>1</sup>H NMR (400 MHz, CDCl<sub>3</sub>) δ 3.80 (2H, dd, *J* = 1.6, 5.6 Hz), 6.37 (1H, d, *J* = 15.6 Hz), 6.48 (1H, dt, *J* = 5.4, 16.0 Hz), 7.16-7.21 (1H, m), 7.23-7.47 (10H, m), 7.56-7.59 (2H, m), 7.76-7.78 (1H, m), 7.84-7.87 (1H, m); <sup>13</sup>C NMR (100 MHz, CDCl<sub>3</sub>) δ 30.5, 122.2, 122.6, 124.27, 124.3, 126.1 (2C), 127.1, 128.1, 128.2, 128.5 (2C), 128.6 (2C), 129.0, 129.5 (2C), 131.1, 134.4, 137.3, 139.1, 139.8, 140.5; IR (KBr) : 1597, 1488, 1438, 966, 744 cm<sup>-1</sup>; HRMS-EI: *m/z* [M<sup>+</sup>] calcd for C<sub>23</sub>H<sub>18</sub>S : 326.1129; found 326.1128.

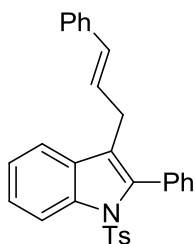

3-Cinnamyl-2-phenyl-1-tosyl-1*H*-indole (**5b**): 97% Yield, White solid, mp 136-137 °C, <sup>1</sup>H NMR (400 MHz, CDCl<sub>3</sub>) δ 2.30 (3H, s), 3.35 (2H, dd, *J* = 2.0, 6.0 Hz), 5.86 (1H, dt, *J* = 2.0, 15.6 Hz), 6.24 (1H, dt, *J* = 5.6, 16.0 Hz), 7.05-7.08 (2H, m), 7.11-7.99 (3H, m), 7.22-7.33 (5H, m), 7.36-7.45 (7H, m), 8.35 (1H, dt, *J* = 0.5, 8.8 Hz); <sup>13</sup>C NMR (100 MHz, CDCl<sub>3</sub>) δ 21.5, 27.7, 116.6, 119.5, 121.7, 124.2, 125.0, 126.0, 126.9, 127.1, 127.5, 127.8, 128.4, 128.6, 129.2, 130.5, 131.0, 131.2, 131.3, 134.8, 137.2, 137.6, 137.7, 144.4; IR (KBr) 3027, 2895, 1598, 1496, 1450, 1362, 1187, 1173, 666, 576, 543 cm<sup>-1</sup>; HRMS-EI: *m/z* [M<sup>+</sup>] calcd for C<sub>30</sub>H<sub>25</sub>NO<sub>2</sub>S : 463.1606; found 463.1606.

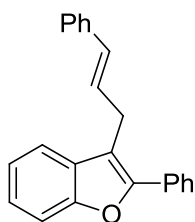

3-Cinnamyl-2-phenylbenzofuran (**6b**)<sup>3</sup>

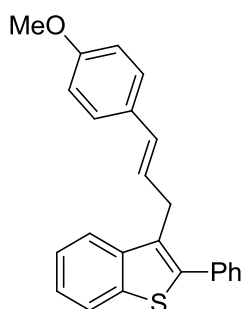

(*E*)-3-{3-(4-Methoxyphenyl)allyl}-2-phenylbenzo[*b*]thiophene (**4c**): 95% yield, Colorless solid, mp 78-80 °C, <sup>1</sup>H NMR (400 MHz, CDCl<sub>3</sub>) δ 3.76-3.77 (2H, m), 3.76 (3H, s), 6.32-6.33 (2H, m), 6.79-6.82 (2H, m), 7.22-7.23 (2H, m), 7.31-4.46 (5H, m), 7.56-7.59 (2H, m), 7.76-7.78 (1H, m), 7.83-7.86 (1H, m); <sup>13</sup>C NMR (100 MHz, CDCl<sub>3</sub>) δ 30.4, 55.3, 113.9 (2C), 122.2, 122.7, 124.3, 124.3, 125.9, 127.2 (2C), 128.1, 128.6 (2C), 129.3, 129.5 (2C), 130.2, 130.4, 134.4, 139.1, 139.7, 140.6, 158.9; IR (KBr): 1602, 1504, 1247, 837, 765 cm<sup>-1</sup>; HRMS-EI: *m/z* [M<sup>+</sup>] calcd for C<sub>24</sub>H<sub>20</sub>OS : 356.1235; found 356.1233.

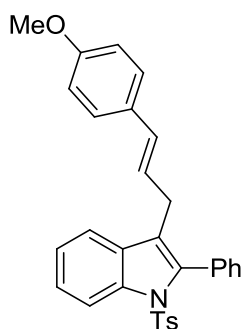

(*E*)-3-{3-(4-Methoxyphenyl)allyl}-2-phenyl-1-tosyl-1*H*-indole (**5c**): 96% Yield, White solid, mp 155-156 °C,  $^1\text{H}$  NMR (400 MHz,  $\text{CDCl}_3$ )  $\delta$  2.30 (3H, s), 3.32 (2H, dd,  $J = 1.6, 5.6$  Hz), 3.76 (3H, s), 5.83 (1H, d,  $J = 15.6$  Hz), 6.08 (1H, dt,  $J = 5.6, 16.0$  Hz), 6.77 (2H, d,  $J = 8.4$  Hz), 7.05-7.08 (4H, m), 7.26-7.32 (3H, m), 7.36-7.44 (7H, m), 8.36 (1H, dd,  $J = 0.8, 8.4$  Hz);  $^{13}\text{C}$  NMR (100 MHz,  $\text{CDCl}_3$ )  $\delta$  21.5, 27.7, 55.3, 113.8, 116.6, 119.7, 122.0, 124.2, 125.0, 125.6, 126.9, 127.1, 127.4, 128.6, 129.2, 129.8, 130.0, 131.0, 131.2, 131.3, 134.8, 137.6 (2C), 144.4, 158.8; IR (KBr) 3030, 2897, 1607, 1511, 1363, 1252, 1174, 665, 578  $\text{cm}^{-1}$ ; HRMS-EI:  $m/z$  [ $\text{M}^+$ ] calcd for  $\text{C}_{31}\text{H}_{27}\text{NO}_3\text{S}$ : 493.1712; found 493.1710.

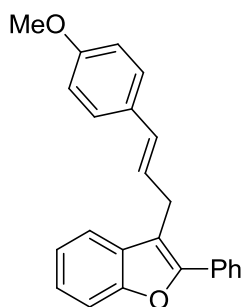

(*E*)-3-{3-(4-Methoxyphenyl)allyl}-2-phenylbenzofuran (**6c**): 80% Yield, White solid, 100-102 °C,  $^1\text{H}$  NMR (400 MHz,  $\text{CDCl}_3$ )  $\delta$  3.73 (3H, s), 3.77 (2H, d,  $J = 5.6$  Hz), 6.28-6.44 (2H, m), 6.79 (2H, dd,  $J = 1.6, 8.4$  Hz), 7.20-7.55 (9H, m), 7.80 (2H, d,  $J = 5.6$  Hz);  $^{13}\text{C}$  NMR (100 MHz,  $\text{CDCl}_3$ )  $\delta$  27.6, 55.2, 111.0, 113.4, 113.9 (2C), 119.8, 122.5, 124.4, 124.9, 127.0 (3C), 127.3 (2C), 128.3, 128.7 (2C), 130.1, 130.4, 130.9, 151.6, 154.0, 158.9; IR (KBr) 3055, 3028, 3008, 2955, 2905, 2891, 2835, 1671, 1653, 1309, 1180, 1060, 519  $\text{cm}^{-1}$ ; HRMS-EI:  $m/z$  [ $\text{M}^+$ ] calcd for  $\text{C}_{24}\text{H}_{20}\text{O}_2$ : 340.1462; found 340.1463.



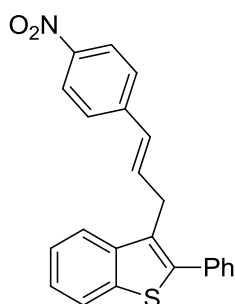

(*E*)-3-{3-(4-Nitrophenyl)allyl}-2-phenylbenzo[*b*]thiophene (**4d**): 88% Yield, Yellow solid, mp 185-187 °C ; <sup>1</sup>H NMR (400 MHz, CDCl<sub>3</sub>) δ 3.85 (2H, dd, *J* = 2, 5.8 Hz), 6.41 (1H, d, *J* = 16.0 Hz), 6.67 (1H, dt, *J* = 5.6, 16.0 Hz), 7.35-7.48 (7H, m), 7.55 (2H, br-d, *J* = 6.8 Hz), 7.73 (1H, br-d, *J* = 7.2 Hz), 7.87 (1H, br-d, *J* = 6.8 Hz), 8.12 (2H, d, *J* = 8.8 Hz); <sup>13</sup>C NMR (100 MHz, CDCl<sub>3</sub>) δ 30.6, 122.3, 122.4, 123.9 (2C), 124.4, 124.5, 126.6 (2C), 128.0, 128.3, 128.7 (2C), 129.3, 129.5 (2C), 133.5, 134.1, 139.2, 140.2, 140.4, 143.8, 146.6 ; IR (KBr):1647, 1598, 1509, 1337, 765 cm<sup>-1</sup>; HRMS-EI: *m/z* [M<sup>+</sup>] calcd for C<sub>23</sub>H<sub>17</sub>NO<sub>2</sub>S : 371.0980 ; found 371.0981.

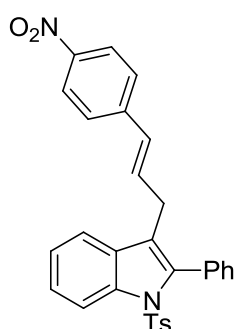

(*E*)-3-{3-(4-Nitrophenyl)allyl}-2-phenyl-1-tosyl-1*H*-indole (**5d**): 99% Yield, Yellow solid, mp 190-191 °C, <sup>1</sup>H NMR (400 MHz, CDCl<sub>3</sub>) δ 2.32 (3H, s), 3.41 (2H, dd, *J* = 2.0, 5.6 Hz), 5.97 (1H, d, *J* = 16.0 Hz), 6.41 (1H, dt, *J* = 5.6, 16.0 Hz), 7.09 (2H, d, *J* = 8.0 Hz), 7.23-7.46 (12H, m), 8.09 (2H, d, *J* = 8.8 Hz), 8.37 (1H, d, *J* = 8.0 Hz); <sup>13</sup>C NMR (100 MHz, CDCl<sub>3</sub>) δ 21.6, 28.0, 116.5, 119.2, 120.5, 123.9, 124.2, 125.2, 126.5, 126.9, 127.6, 128.8(2C), 129.3, 130.7, 131.0(2C), 133.1, 135.0, 137.4, 137.9, 143.6, 144.5, 146.5 ; IR (KBr) 3059, 2921, 1596, 1513, 1340, 1174, 754, 664, 577 cm<sup>-1</sup> ; HRMS-EI: *m/z* [M<sup>+</sup>] calcd for C<sub>30</sub>H<sub>24</sub>N<sub>2</sub>O<sub>4</sub>S : 508.1457; found 508.1456.

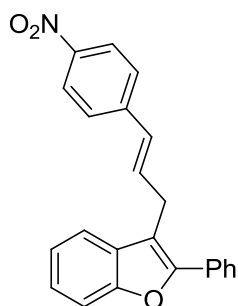

(*E*)-3-{3-(4-Nitrophenyl)allyl}-2-phenylbenzofuran (**6d**): 84% Yield, Yellow solid, mp 119-121 °C,  $^1\text{H}$  NMR (400 MHz,  $\text{CDCl}_3$ )  $\delta$  3.88 (2H, dd,  $J = 2.0, 5.6$  Hz), 6.52 (1H, d,  $J = 16.0$  Hz), 6.67-6.74 (1H, m), 7.23-7.56 (9H, m), 7.78 (2H, d,  $J = 8.8$  Hz), 8.12 (2H, d,  $J = 8.8$  Hz);  $^{13}\text{C}$  NMR (100 MHz,  $\text{CDCl}_3$ )  $\delta$  27.9, 111.3, 112.2, 119.5, 122.7, 123.9 (2C), 124.7, 126.7 (2C), 127.0 (2C), 128.6, 128.8 (2C), 129.3, 130.1, 130.7, 132.5, 143.7, 146.7, 152.0, 154.1; IR (KBr) 3052, 2900, 2875, 2824, 1684, 1379, 1261, 1025, 970, 842, 488  $\text{cm}^{-1}$ ; HRMS-EI:  $m/z$  [ $\text{M}^+$ ] calcd for  $\text{C}_{23}\text{H}_{17}\text{NO}_3$  : 355.1210; found 355.1208.

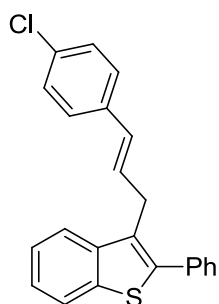

(*E*)-3-{3-(4-Chlorophenyl)allyl}-2-phenylbenzo[*b*]thiophene (**4e**): 93% Yield, Colorless solid, mp 118-120 °C;  $^1\text{H}$  NMR (400 MHz,  $\text{CDCl}_3$ )  $\delta$  3.78 (2H, dd,  $J = 1.6, 5.6$  Hz), 6.30 (1H, br-d,  $J = 16.0$  Hz), 6.43 (1H, dt,  $J = 5.6, 16.0$  Hz), 7.19-7.23 (4H, m), 7.29-7.46 (6H, m), 7.54-7.57 (2H, m), 7.73-7.75 (1H, m), 7.84-7.86 (1H, m);  $^{13}\text{C}$  NMR (100 MHz,  $\text{CDCl}_3$ )  $\delta$  30.3, 122.2, 122.5, 124.3, 124.4 (2C), 127.3, 128.1, 128.5, 128.6, 128.7 (2C), 128.8 (2C), 129.5 (2C), 129.8, 132.6, 134.2, 135.7, 139.0, 139.9, 140.4; IR (KBr): 1484, 1435, 1087, 836, 763  $\text{cm}^{-1}$ ; HRMS-EI:  $m/z$  [ $\text{M}^+$ ] calcd for  $\text{C}_{23}\text{H}_{17}\text{ClS}$  : 360.0739 ; found 360.0734.

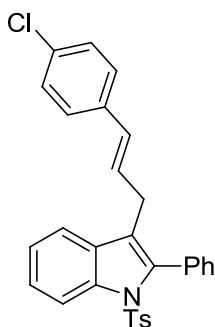

(*E*)-3-{3-(4-Chlorophenyl)allyl}-2-phenyl-1-tosyl-1*H*-indole (**5e**): 93% Yield, White solid, mp 169-170 °C, <sup>1</sup>H NMR (400 MHz, CDCl<sub>3</sub>) δ 2.30 (3H, s), 3.34 (2H, dd, *J* = 1.6, 5.6 Hz), 5.85 (1H, d, *J* = 16.0 Hz), 6.20 (1H, dt, *J* = 6.0, 16.0 Hz), 7.03-7.08 (4H, m), 7.19 (2H, dt, *J* = 2.8, 8.0 Hz), 7.25-7.45 (10H, m), 8.36 (1H, dd, *J* = 0.8, 8.4 Hz); <sup>13</sup>C NMR (100 MHz, CDCl<sub>3</sub>) δ 21.5, 27.7, 116.5, 119.4, 121.4, 124.2, 125.1, 126.9, 127.2, 127.5, 128.5, 128.6, 128.7, 129.2, 129.3, 131.0, 131.1 (2C), 132.7, 134.9, 135.7, 137.5, 137.7, 144.4; IR (KBr) 3054, 2891, 1597, 1452, 1366, 1187, 755, 663, 577 cm<sup>-1</sup>; HRMS-EI: *m/z* [M<sup>+</sup>] calcd for C<sub>26</sub>H<sub>25</sub>NO<sub>2</sub>S : 497.1216, found 497.1214.

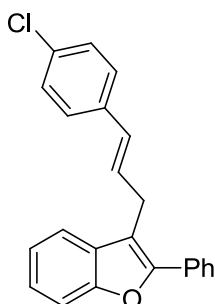

(*E*)-3-{3-(4-Chlorophenyl)allyl}-2-phenylbenzofuran (**6e**): 82% Yield, White solid, mp 59-61 °C, <sup>1</sup>H NMR (400 MHz, CDCl<sub>3</sub>) δ 3.82 (2H, d, *J* = 4.0 Hz), 6.44-6.50 (2H, m), 7.22-7.24 (5H, m), 7.30-7.41 (2H, m), 7.45-7.50 (2H, m), 7.52-7.57 (2H, m), 7.77- 7.80 (2H, m); <sup>13</sup>C NMR (100 MHz, CDCl<sub>3</sub>) δ 27.6, 111.1, 112.8, 119.6, 122.5, 124.4, 126.9 (2C), 127.3 (2C), 127.9, 128.3, 128.5 (2C), 128.7 (2C), 129.8, 130.3, 130.8, 132.7, 135.6, 151.7, 154.0; IR (KBr) 3041, 2894, 1652, 1485, 1448, 1260, 1178, 1098, 973, 841, 690 cm<sup>-1</sup>; HRMS-EI: *m/z* [M<sup>+</sup>] calcd for C<sub>23</sub>H<sub>17</sub>ClO : 346.0935; found 346.0938.

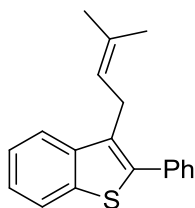

3-(3-Methylbut-2-en-1-yl)-2-phenylbenzo[*b*]thiophen (**4f**): 82% Yield, White solid, mp 60-62 °C, <sup>1</sup>H NMR (400 MHz, CDCl<sub>3</sub>) δ 1.72 (3H, d, *J* = 1.6 Hz), 1.72 (3H, d, *J* = 0.8 Hz), 3.72 (2H, d, *J* = 6.8 Hz), 5.28-5.32 (1H, m), 7.31-7.46 (5H, m), 7.51-7.54 (2H, m), 7.70-7.73 (1H, m), 7.82-7.84 (1H, m); <sup>13</sup>C NMR (100 MHz, CDCl<sub>3</sub>) δ 18.0, 25.7, 26.3, 122.2, 122.5, 122.5, 124.1, 124.2, 127.9, 128.5 (2C), 129.8 (2C), 131.4, 132.3, 134.7, 138.5, 139.2, 140.6; IR (KBr): 1597, 1483, 1436, 1186, 757 cm<sup>-1</sup>; HRMS-EI: *m/z* [M<sup>+</sup>] calcd for C<sub>23</sub>H<sub>17</sub>NO<sub>2</sub>S : 278.1129 ; found 278.1130.

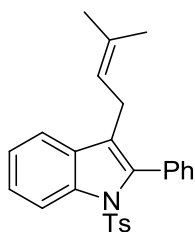

3-(3-Methylbut-2-en-1-yl)-2-phenyl-1-tosyl-1*H*-indole (**5f**): 98% yield, Pale yellow solid, mp 74-76 °C, <sup>1</sup>H NMR (400 MHz, CDCl<sub>3</sub>) δ 1.51 (3H, s), 1.59 (3H, s), 2.26 (3H, s), 3.14 (2H, d, *J* = 6.8 Hz), 5.00 (1H, t, *J* = 6.8 Hz), 7.03 (2H, d, *J* = 8.4 Hz), 7.24-7.43 (10H, m), 8.31 (1H, br-d, *J* = 8.4 Hz) ; <sup>13</sup>C NMR (100 MHz, CDCl<sub>3</sub>) δ 17.7, 21.5, 23.7, 25.6, 116.1, 119.5, 121.8, 123.5, 123.8, 124.8, 126.8 (2C), 127.4, 128.4, 129.2, 131.0, 131.4, 132.1, 135.1, 136.5, 137.3, 144.3 ; IR (KBr) 3059, 2906, 1596, 1451, 1366, 1169, 1117, 929, 803, 751, 701, 580, 545 cm<sup>-1</sup>; HRMS-EI: *m/z* [M<sup>+</sup>] calcd for C<sub>26</sub>H<sub>25</sub>NO<sub>2</sub>S : 415.1606, found 415.1608.

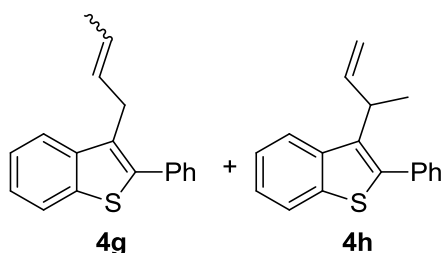

3-(But-2-en-1-yl)-2-phenylbenzo[*b*]thiophene (**4g**) and 3-(but-3-en-2-yl)-2-phenylbenzo[*b*]thiophene (**4h**) : as a inseparable mixture of (*E*)-**4g** , (*Z*)-**4g** and **4h** in a 1 : 0.2 : 1 ratio determined by <sup>1</sup>H-NMR spectra.; 80% yield, colorless oil , <sup>1</sup>H NMR (400 MHz, CDCl<sub>3</sub>) δ 1.51 (3/2.2 H, d, *J* = 7.2 Hz : **4h**), 1.66 (3/2.2 H, dd, *J* = 1.6, 6.4 Hz : **4g E** isomer), 1.72 (0.6/2.2 H, d-like, *J* = 4.8 Hz : **4g Z** isomer), 3.56 (2/2.2 H, dt, *J* = 1.6, 5.6 Hz : **4g E** isomer), 3.62-3.63 (0.4/2.2 H, m : **4g Z** isomer), 3.97-4.05 (1/2.2 H, m : **4h**), 5.11 (1/2.2 H, ddd, *J* = 1.2, 2.0, 17.2 Hz : **4h**), 5.13 (1/2.2 H, ddd, *J* = 1.2, 2.0, 10.4 Hz : **4h**), 5.42-5.51 (1/2.2 H, m : **4g E** isomer), 5.54-5.57 (0.4/2.2 H, m : **4g Z** isomer), 5.65-5.72 (1/2.2 H, m : **4g E** isomer), 6.20 (1/2.2 H, ddd, *J* = 4.8, 10.4, 17.2 Hz : **4h**), 7.29-7.90 (19.8/2.2 H, m) ; <sup>13</sup>C NMR (100 MHz, CDCl<sub>3</sub>, **4g E** isomer and **4h**) δ 17.9 (1/2C), 18.8 (1/2C), 30.1 (1/2C), 36.2 (1/2C), 114.1 (1/2C), 122.1 (1/2C), 122.3 (1/2C), 122.7 (1/2C), 123.6 (1/2C), 123.8 (1/2C), 124.1 (1/2C), 124.2 (1/2C), 124.2 (1/2C), 126.6 (1/2C), 127.9 (1/2C), 128.1 (1/2C), 128.5 (3/2C), 128.5, 128.7 (1/2C), 129.5, 129.9 (1/2C), 130.0, 134.4 (1/2C), 134.5 (1/2C), 134.7 (1/2C), 138.8 (1/2C), 138.9 (1/2C), 139.1 (1/2C), 139.6 (1/2C), 140.6 (1/2C), 141.5 (1/2C); IR (KBr) 2976, 2885, 1598, 1437, 744, 697 cm<sup>-1</sup>; HRMS-EI: *m/z* [*M*<sup>+</sup>] calcd for C<sub>18</sub>H<sub>16</sub>S : 264.0973, found 264.0975.

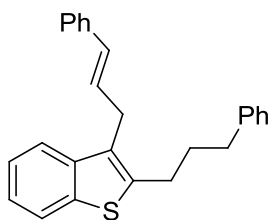

3-Cinnamyl-2-(3-phenylpropyl)benzo[*b*]thiophene (**16**): 66% Yield, yellow oil, <sup>1</sup>H-NMR (400 MHz, CDCl<sub>3</sub>) δ 2.00-2.08 (2 H, quint, *J* = 7.6 Hz), 2.70 (2 H, t, *J* = 7.6 Hz), 2.91 (2 H, t, *J* = 7.6 Hz), 3.64 (2 H, d, *J* = 5.6 Hz), 6.23-6.36 (2 H, m), 7.14-7.33 (12 H, m), 7.66 (1 H, d, *J* = 8.0 Hz), 7.77 (1 H, d, *J* = 8.0 Hz); <sup>13</sup>C-NMR (100 MHz, CDCl<sub>3</sub>) δ 28.0, 29.8, 32.9, 35.3, 121.5, 122.2, 123.5, 123.9, 125.9, 126.0 (2C), 127.1, 127.6, 128.3, 128.4 (5C), 128.6, 130.6, 137.3, 138.4, 140.2, 141.0, 141.7; IR (KBr): 3025, 2934, 2854, 1601 cm<sup>-1</sup>; HRMS-EI : *m/z* [*M*<sup>+</sup>] calcd for C<sub>26</sub>H<sub>24</sub>S : 368.1599; found: 368.1598

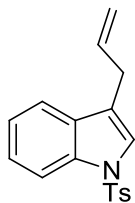

3-Allyl-1-tosyl-1*H*-indole (**18**) : Spectral data are consistent with previously reported data.<sup>4</sup>

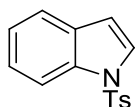

1-Tosyl-1*H*-indole (**19**) : Spectral data are consistent with previously reported data.<sup>5</sup>

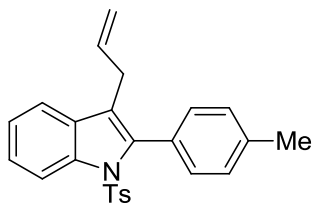

3-Allyl-2-(*p*-tolyl)-1-tosyl-1*H*-indole (**23**): 95% Yield, White solid, mp 104-105 °C, <sup>1</sup>H NMR (400 MHz, CDCl<sub>3</sub>) δ 2.29 (3H, s), 2.44 (3H, s), 3.18 (2H, dt, *J* = 2.0, 5.2 Hz), 4.55 (1H, dd, *J* = 2.0, 17.2 Hz), 4.89 (1H, dd, *J* = 2.0, 10.0 Hz), 5.81-5.88 (1H, m), 7.04 (2H, br-d, *J* = 8.4 Hz), 7.24-7.39 (8H, m), 8.31 (1H, dd, *J* = 0.8, 8.0 Hz) ; <sup>13</sup>C NMR (100 MHz, CDCl<sub>3</sub>) δ 21.5, 28.6, 115.4, 116.5, 119.4, 121.3, 124.0, 124.8, 124.9, 126.8, 128.2 (2C), 129.1, 130.8, 131.3, 134.7, 135.9, 137.5, 137.8, 138.4, 144.4 ; IR (KBr) 3060, 2979, 2915, 1598, 1451, 1367, 1175, 934, 745, 686, 657, 581 cm<sup>-1</sup>; HRMS-EI: *m/z* [M<sup>+</sup>] calcd for C<sub>26</sub>H<sub>25</sub>NO<sub>2</sub>S : 401.1449, found 401.1451.

#### 4. References

- 1 (a) Y. Jiang, T. Kusakabe, K. Takahashi, K. Kato, *Org. Biomol. Chem.*, 2014, **12**, 3380; (b) T. Kurisaki, T. Naniwa, H. Yamamoto, H. Imagawa, M. Nishizawa, *Tetrahedron Lett.*, **2007**, *48*, 1871; (c) A. Arcaidi, S. Cacchi, M. D. Rosario, G. Fabrizi, F. Marinelli, *J. Org. Chem.* **1996**, *61*, 9280; (d) M. Hatano, K. Mikami, *J. Am. Chem. Soc.*, **2003**, *125*, 4704; (e) X. Han, X. Lu, *Org. Lett.*, **2010**, *12*, 3336. (f) M. Mori, D. Tanaka, N. Saito, Y. Sato, *Organometallics*, **2008**, *27*, 6313.
- 2 I. Nakamura, T. Sato, Y. Yamamoto, *Angew. Chem. Int. Ed.*, **2006**, *45*, 4473.
- 3 M. Nakamura, L. Ilies, S. Otsubo, E. Nakamura, *Org. Lett.*, **2006**, *13*, 2803.
- 4 J. R. McAtee, G. P. A. Yap, and D. A. Watson, *J. Am. Chem. Soc.*, **2014**, *136*, 10166.
- 5 R. C. Larock, T. R. Hightower, L. A. Hasvold, and K. P. Peterson, *J. Org. Chem.*, **1996**, *61*, 3584.

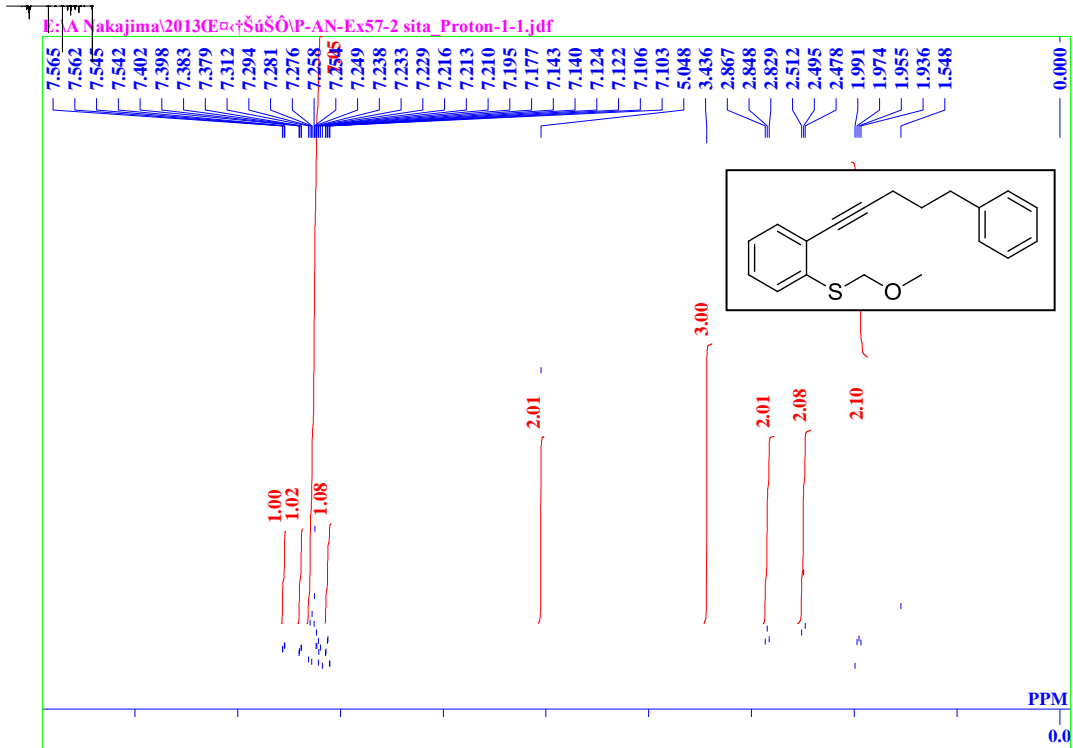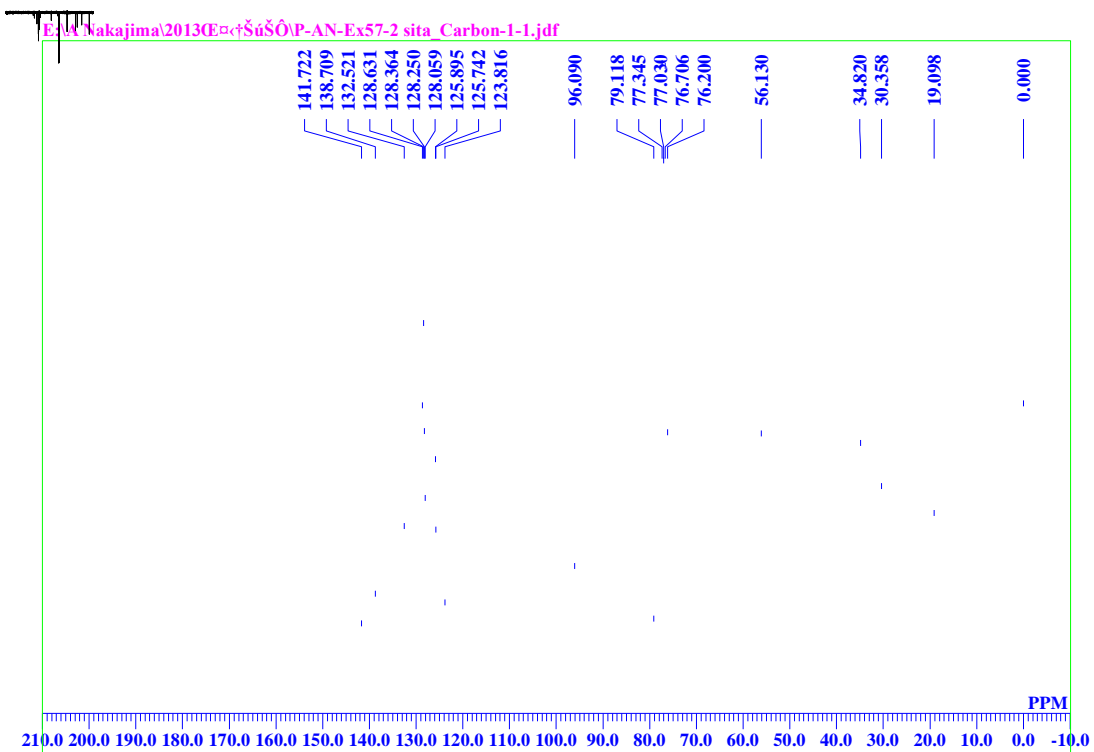



single\_pulse

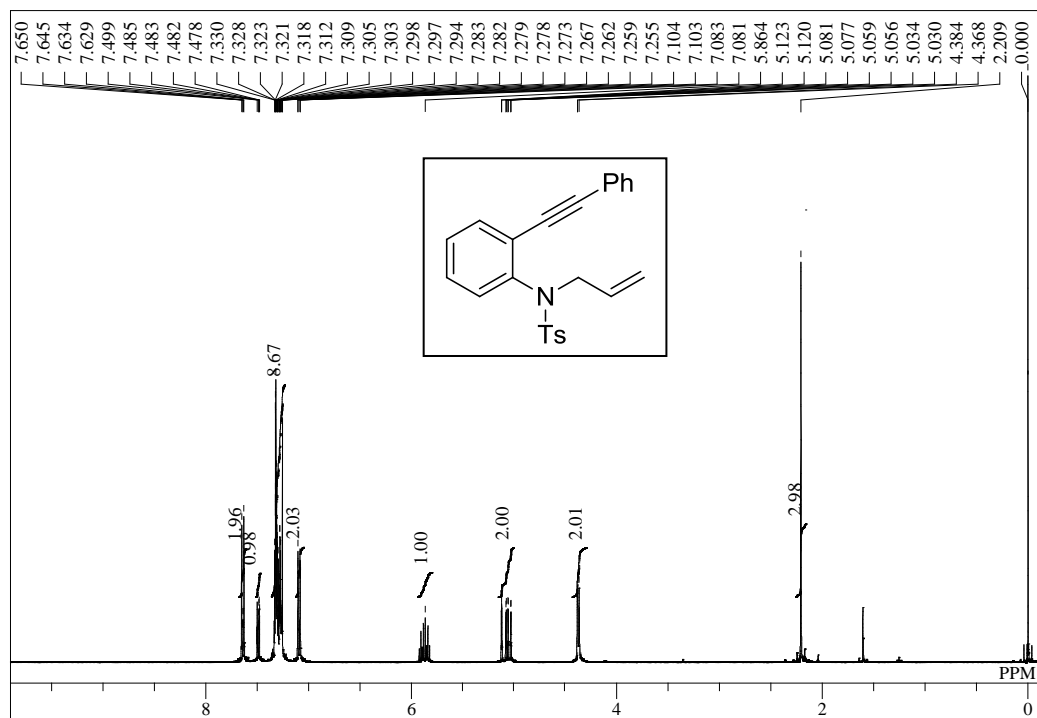

single pulse decoupled gated NOE

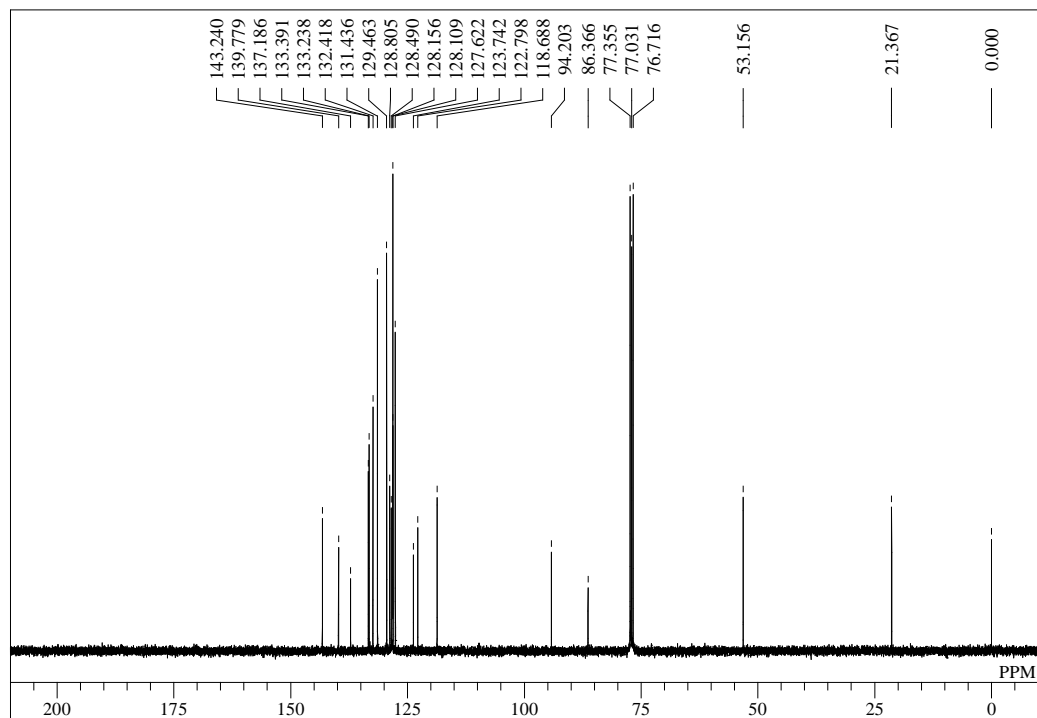

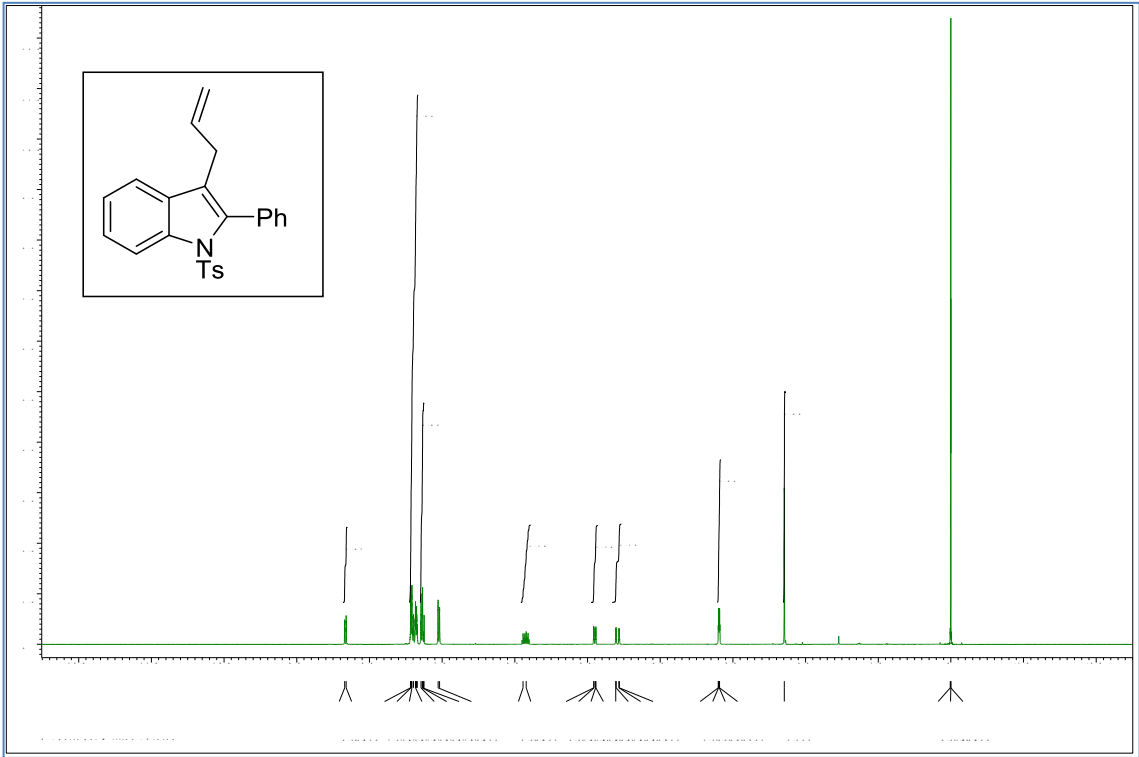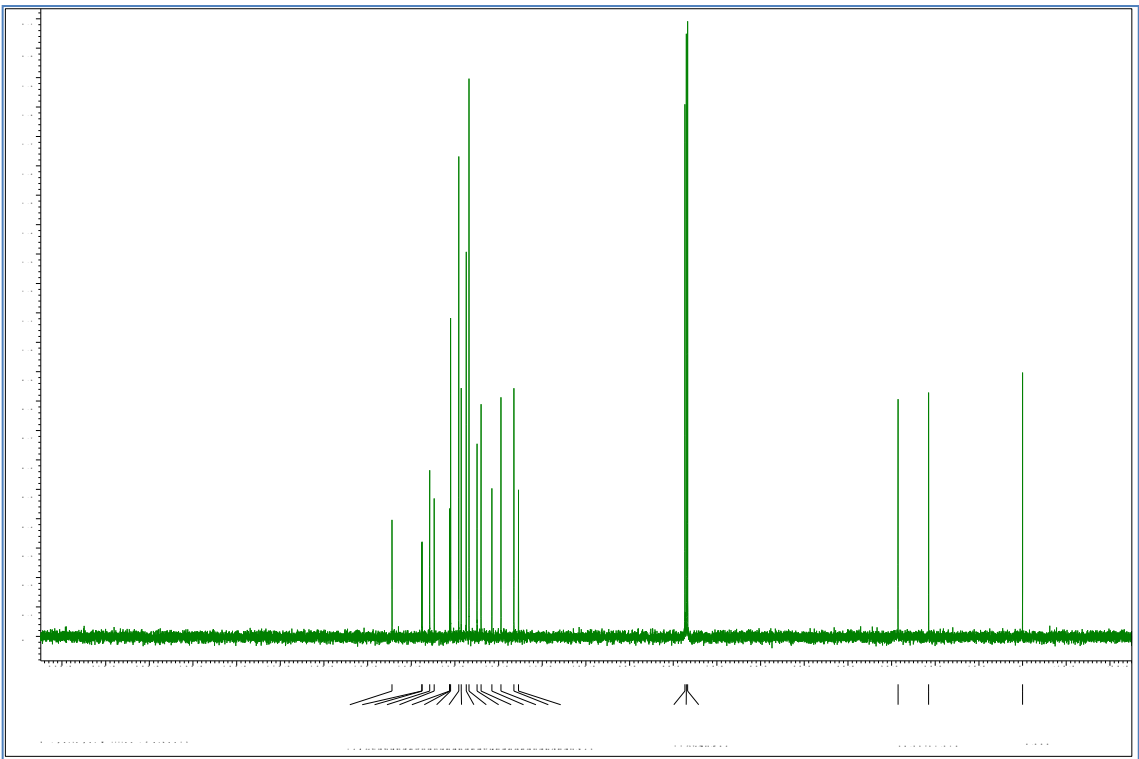

E:\A Nakajima\2013(Ec+SúSÔ)P-AN-Ex.31 Proton-1-1.jdf

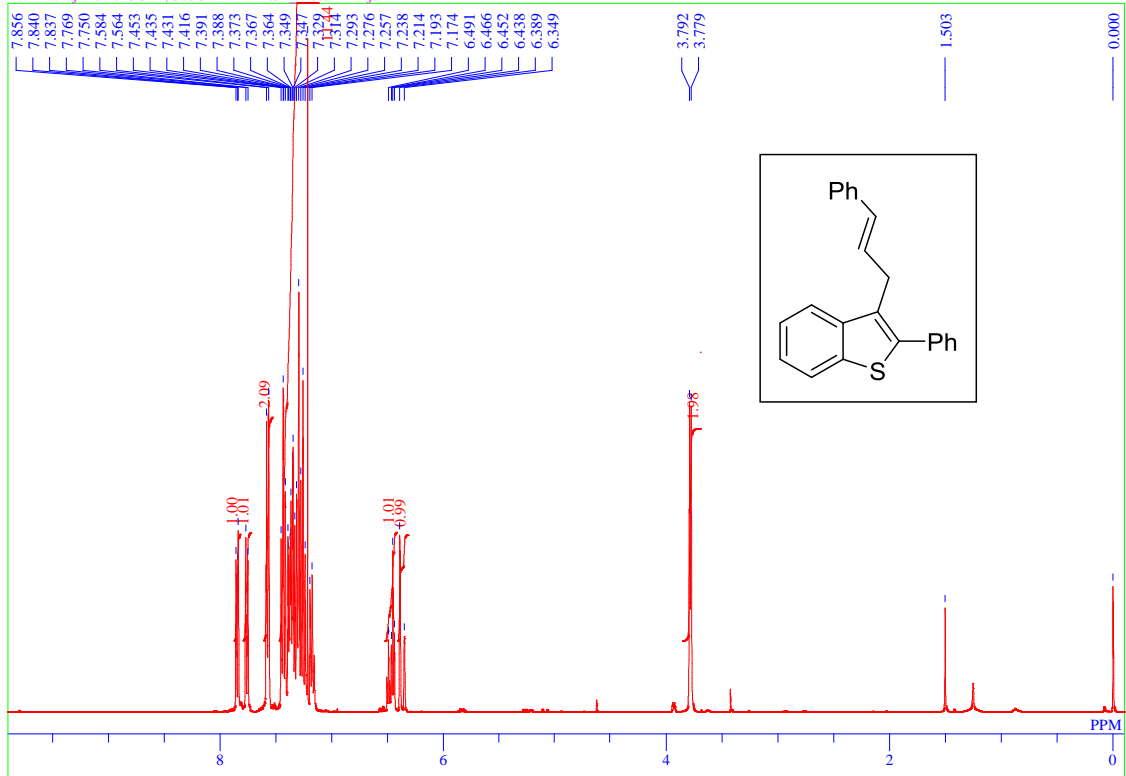

E:\A Nakajima\2013(Ec+SúSÔ)P-AN-Ex.31 Carbon-1-1.jdf

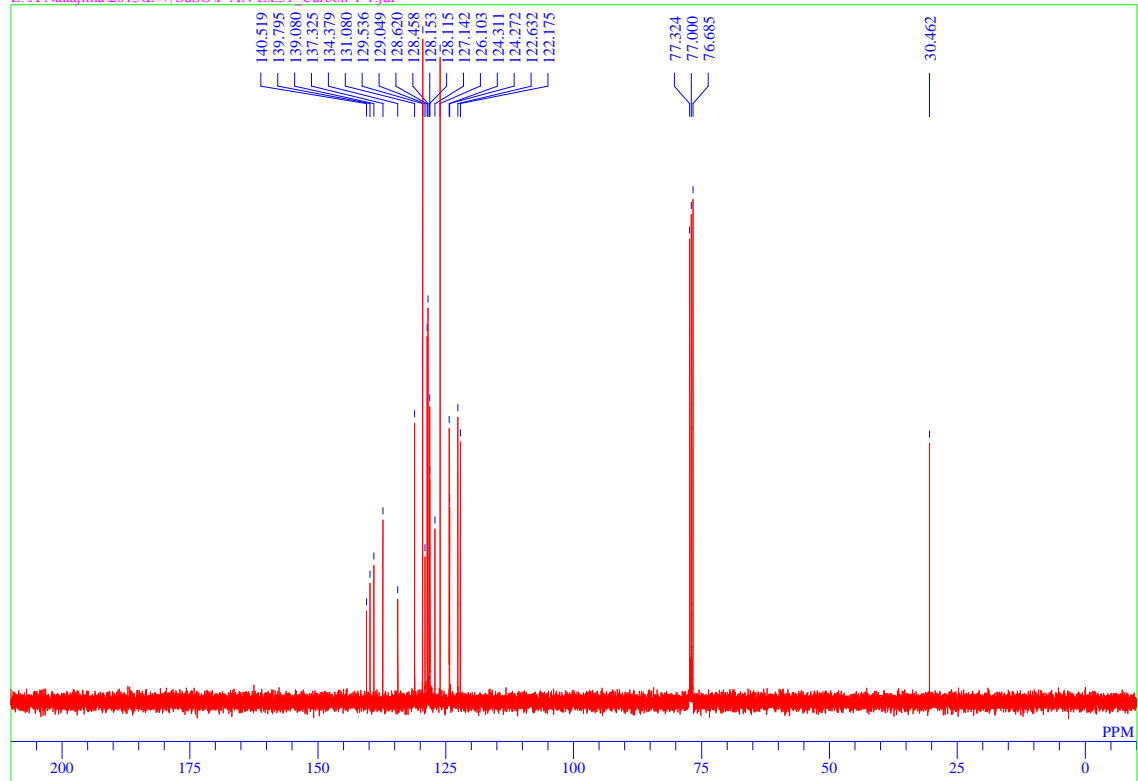

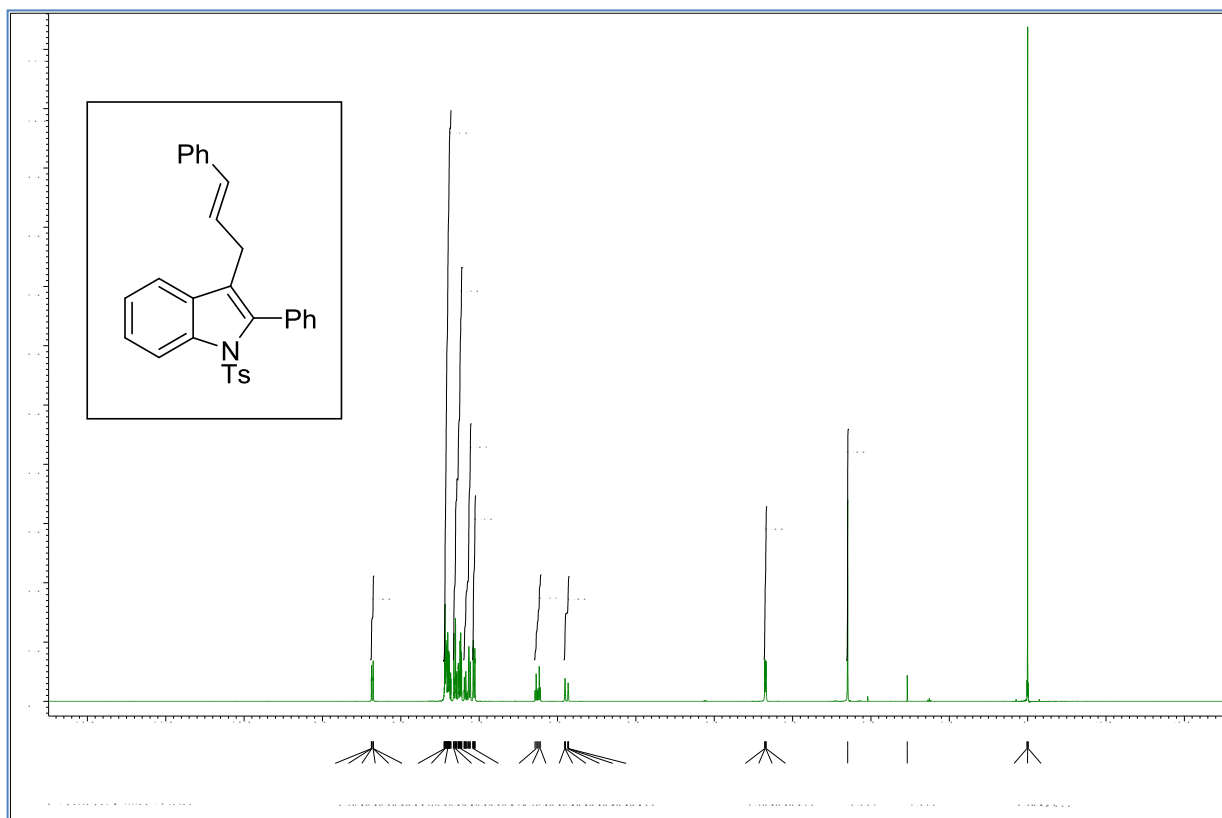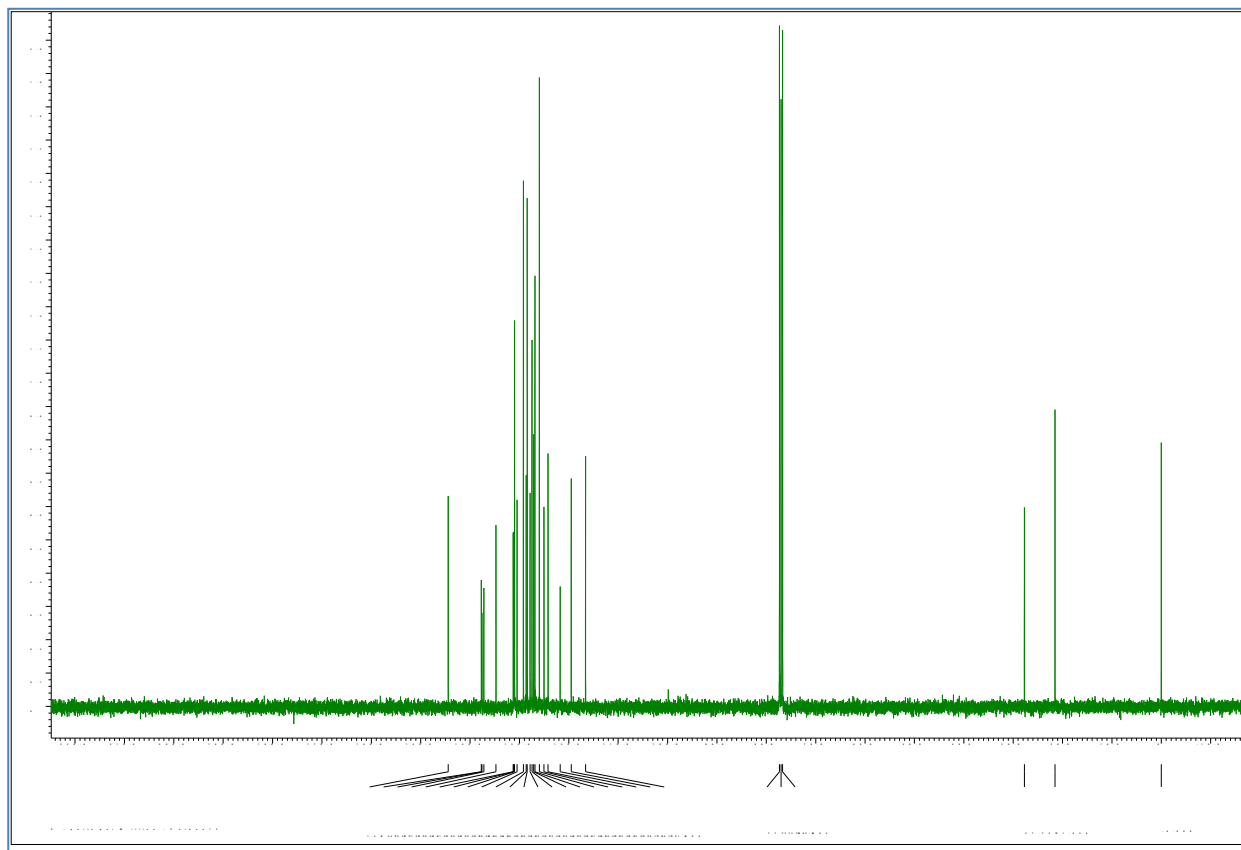

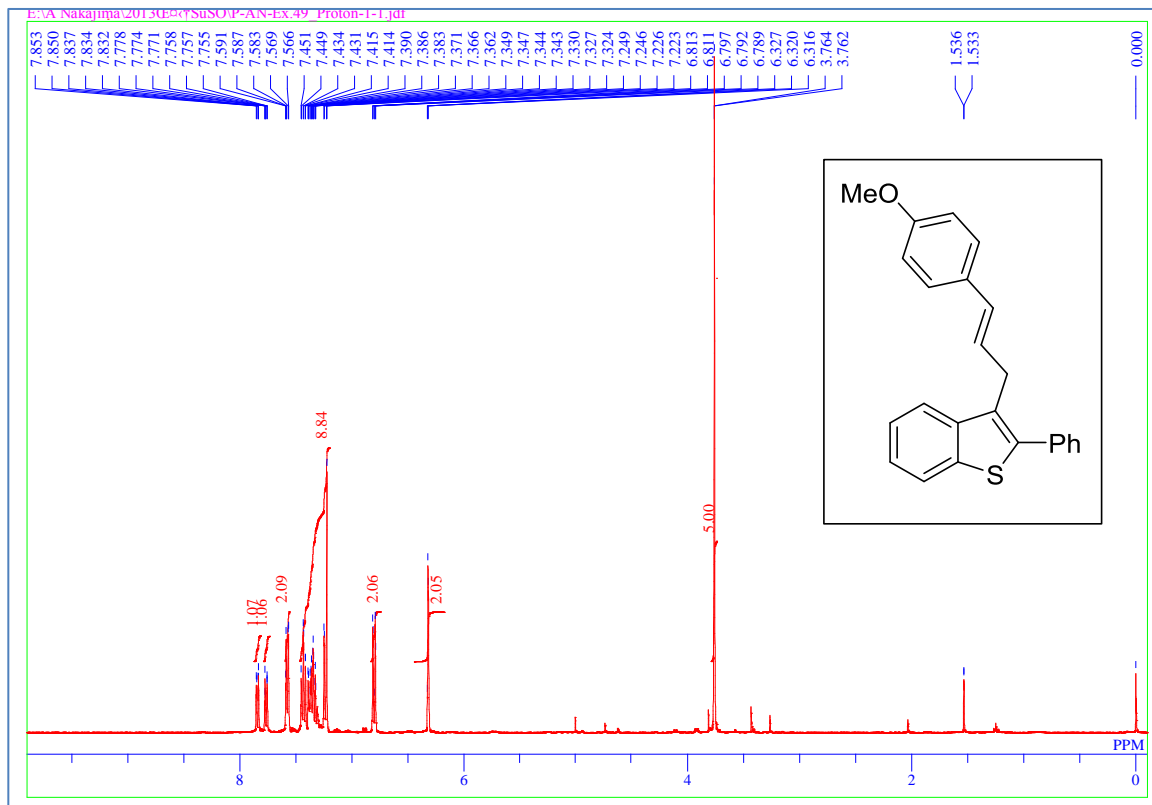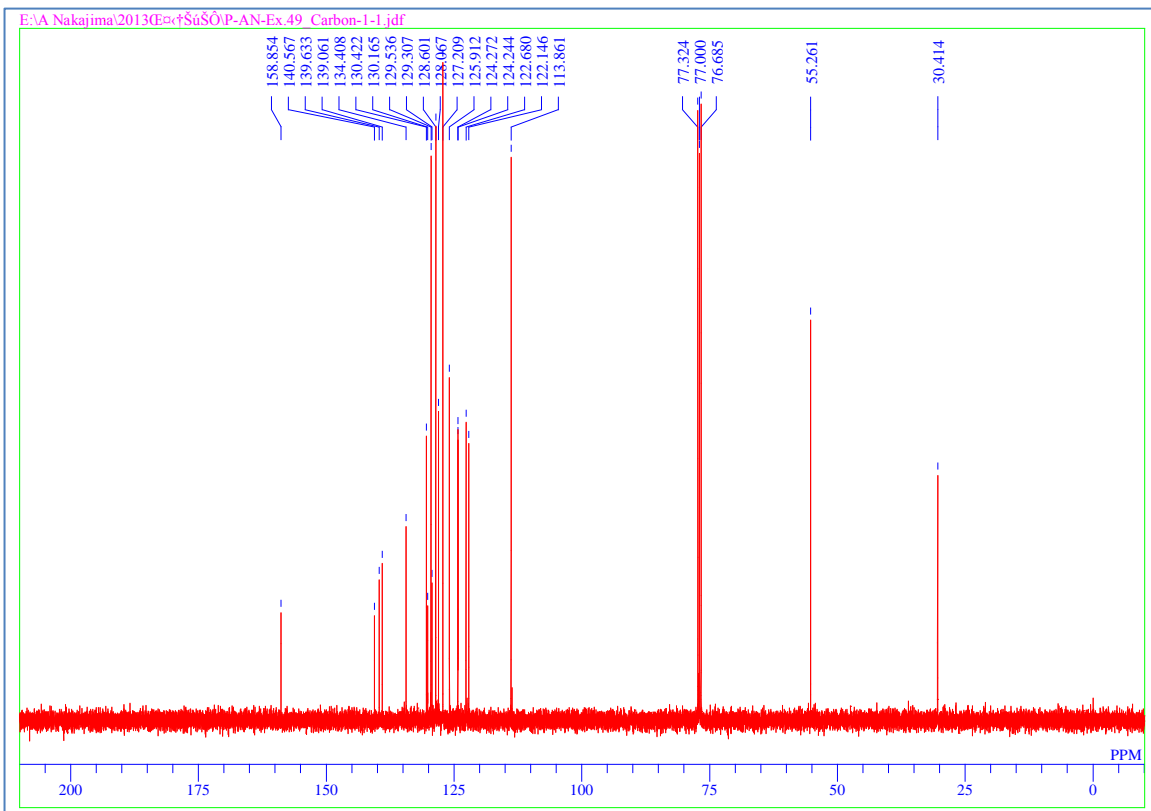

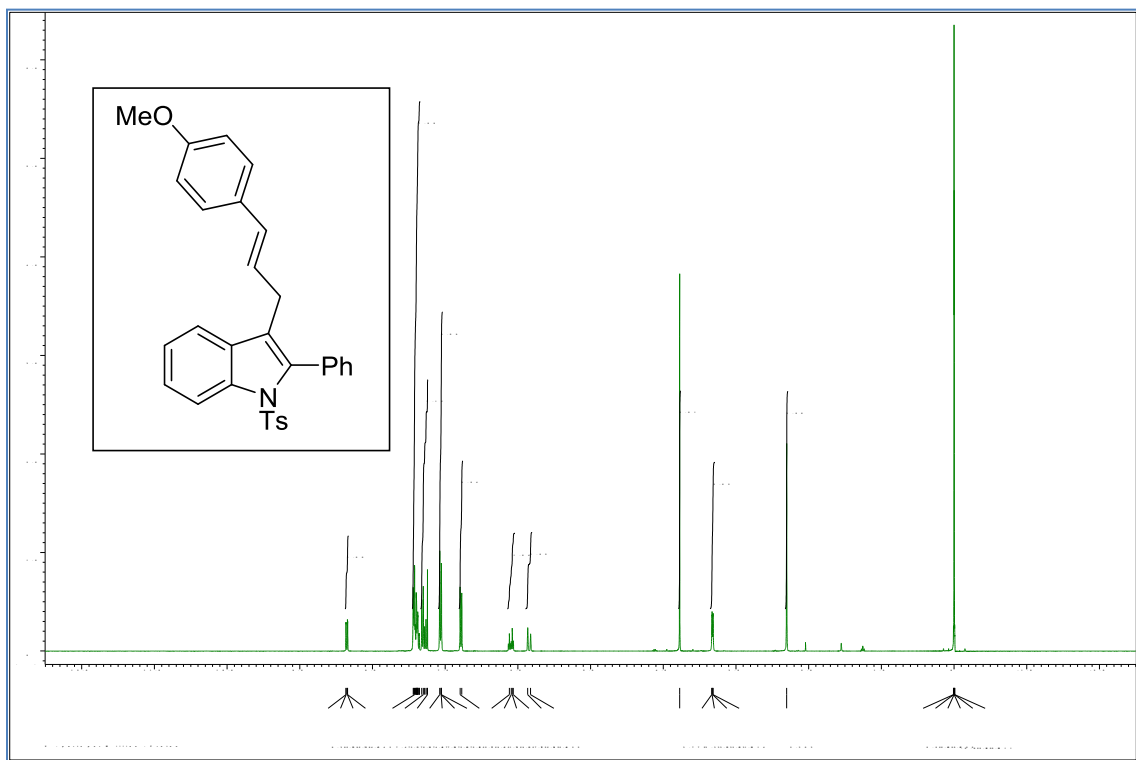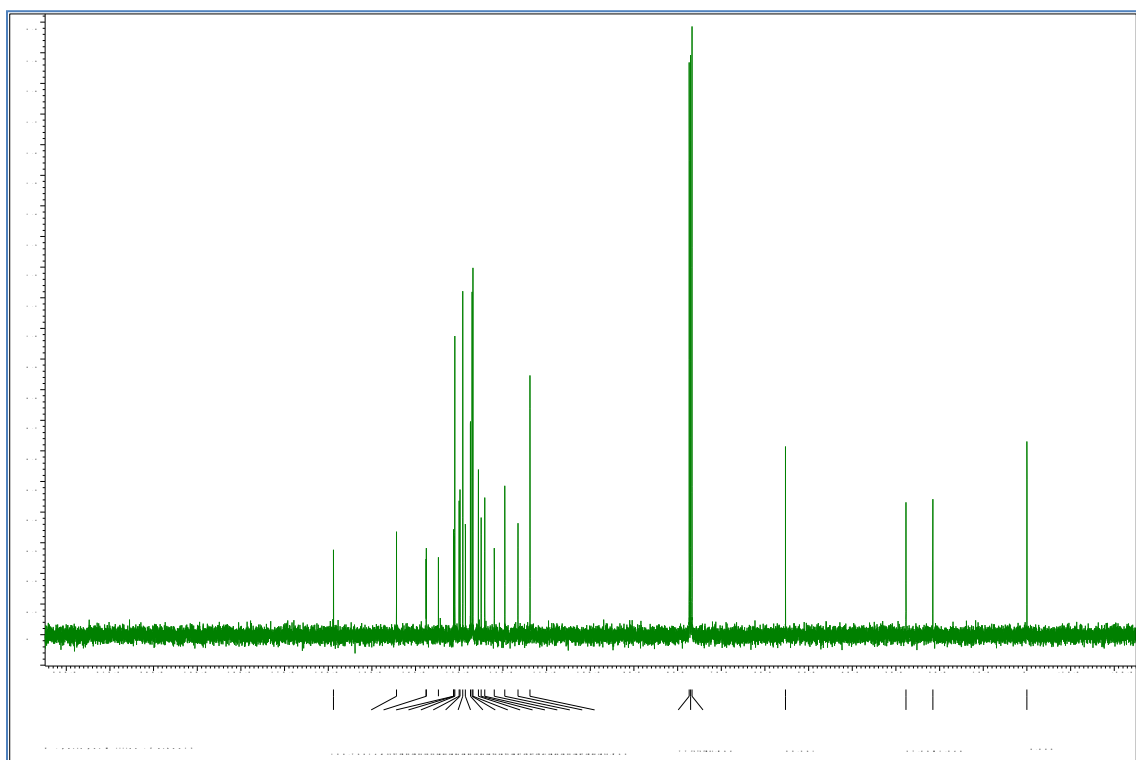

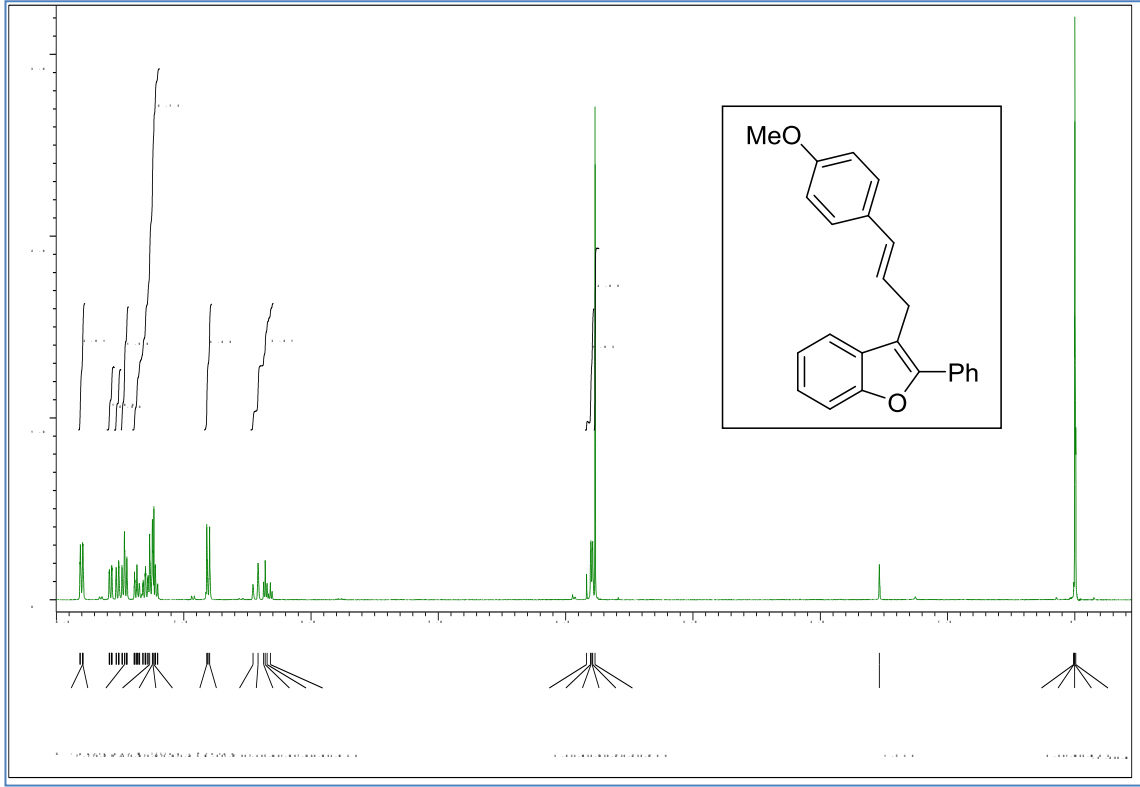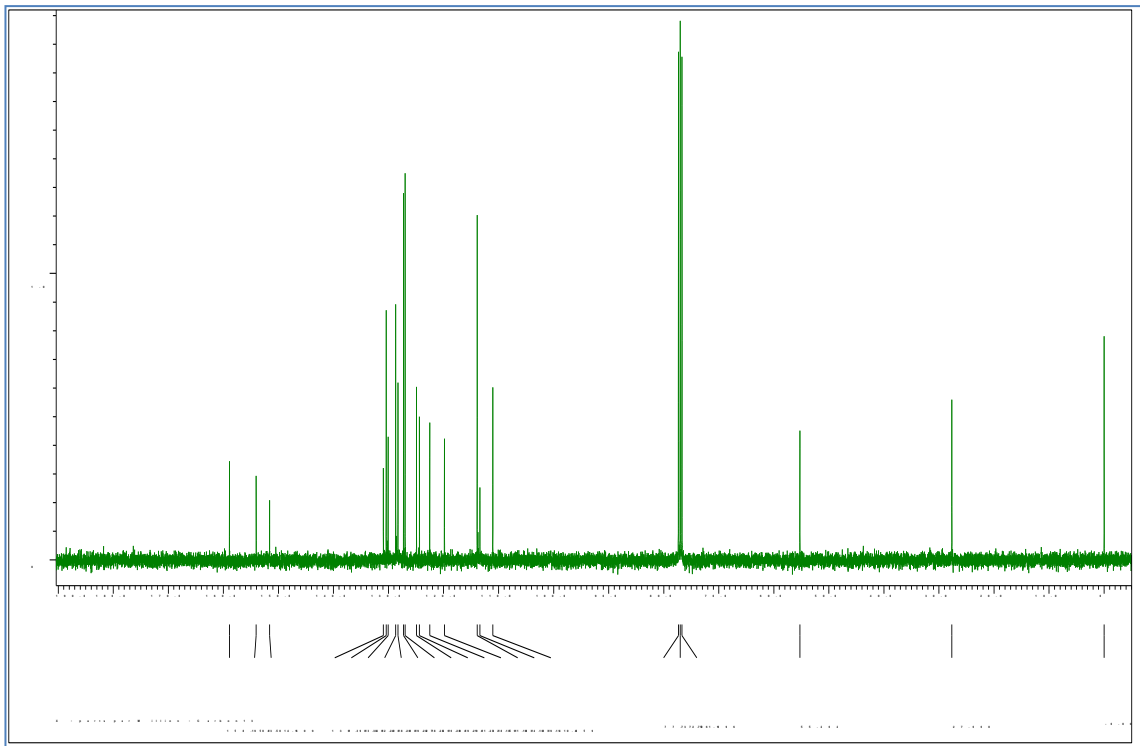

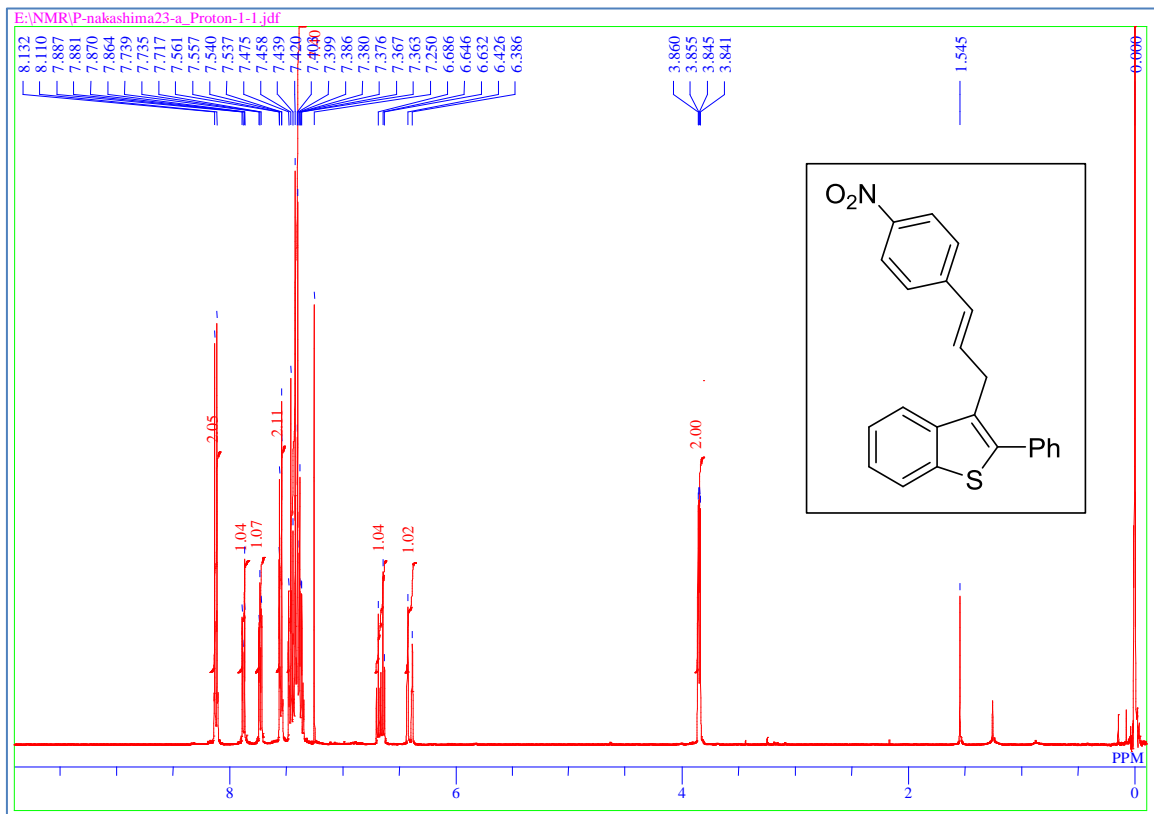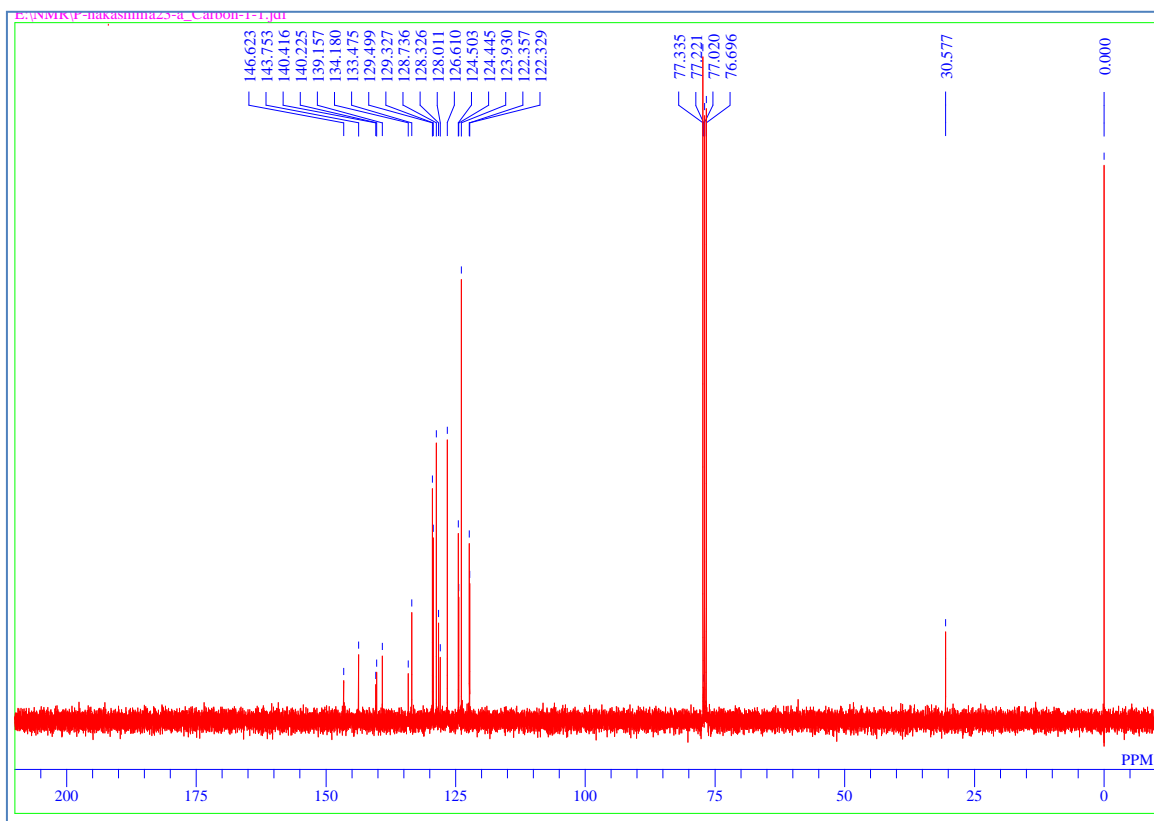



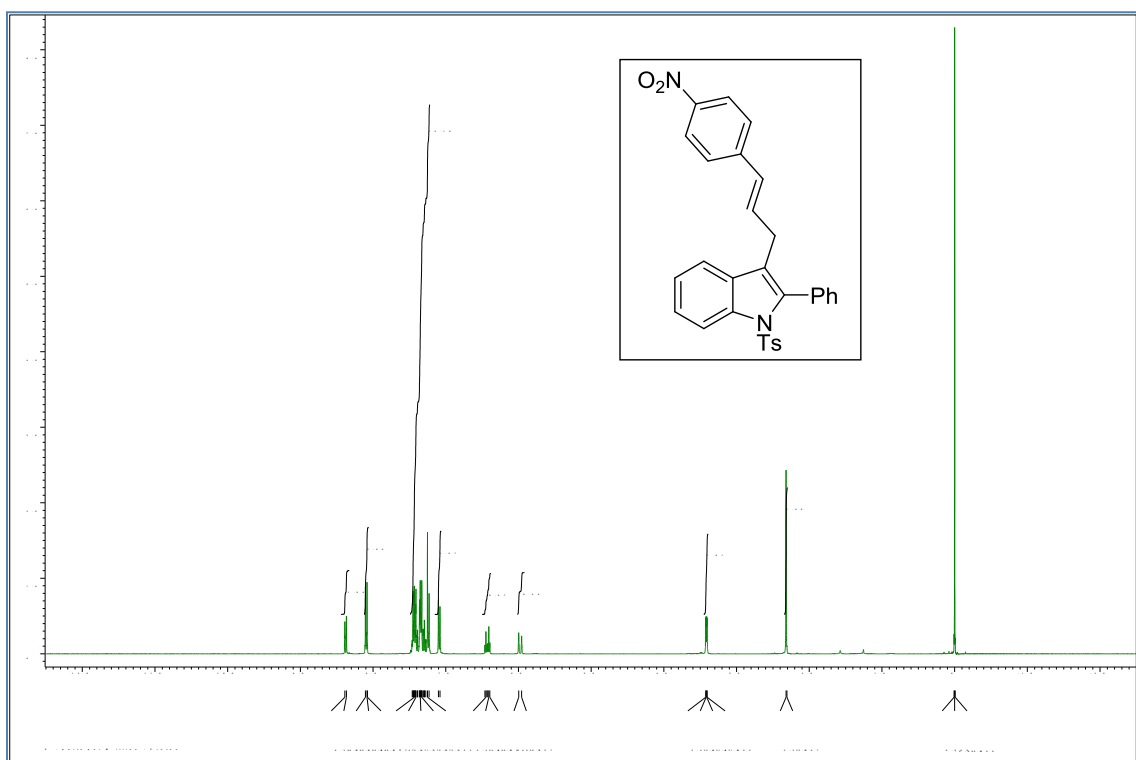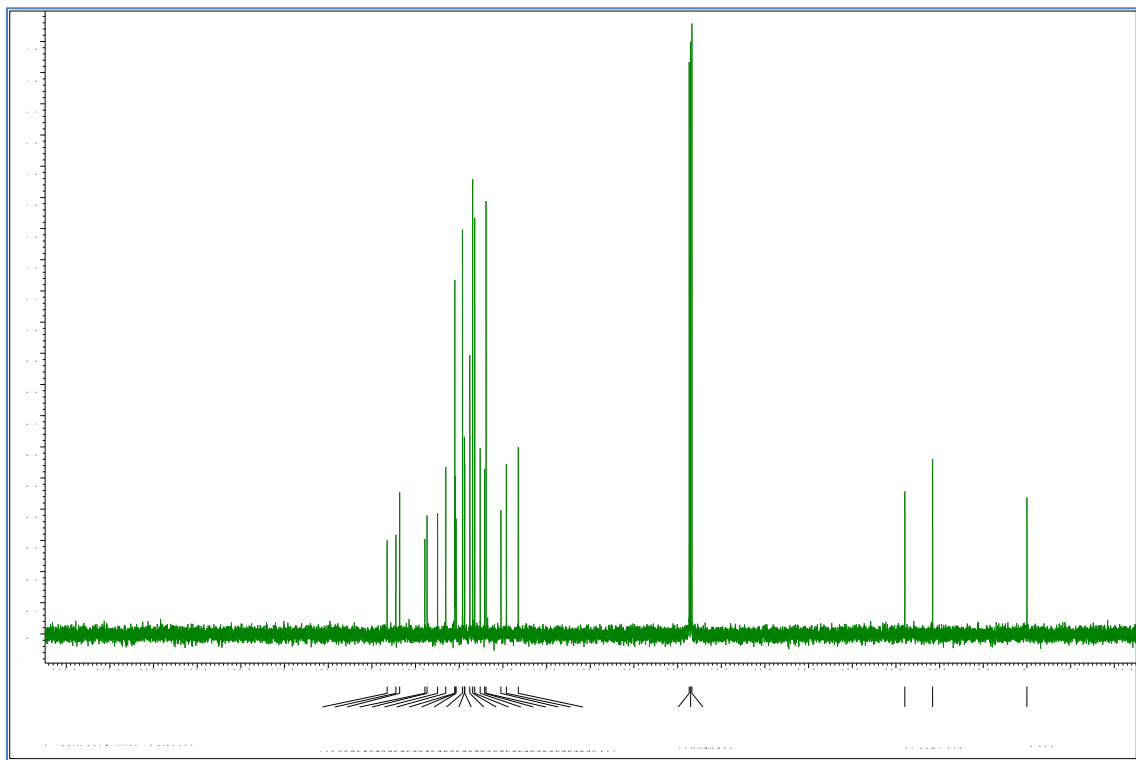

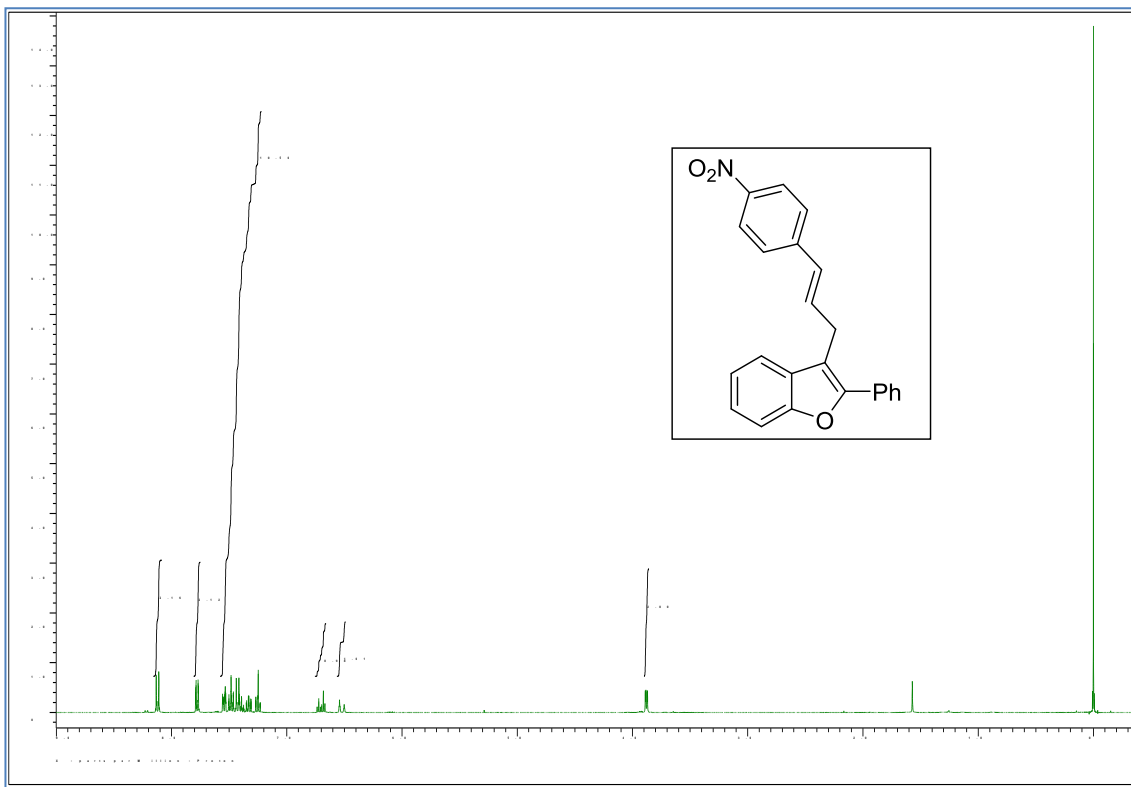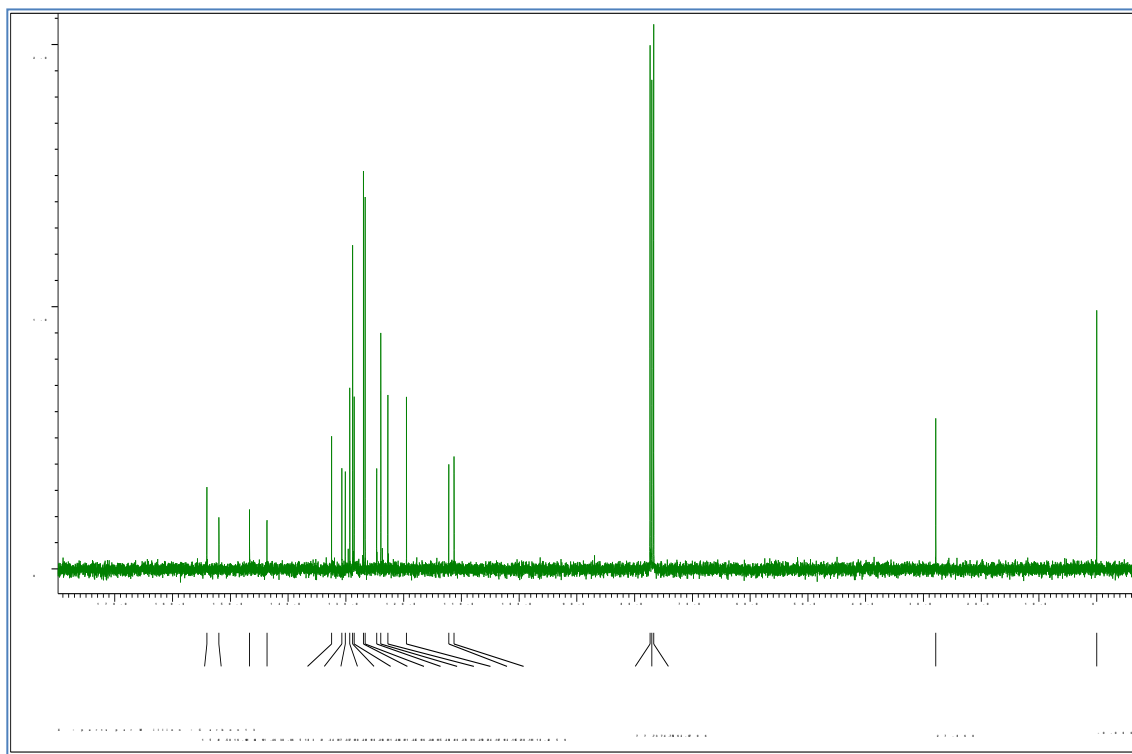

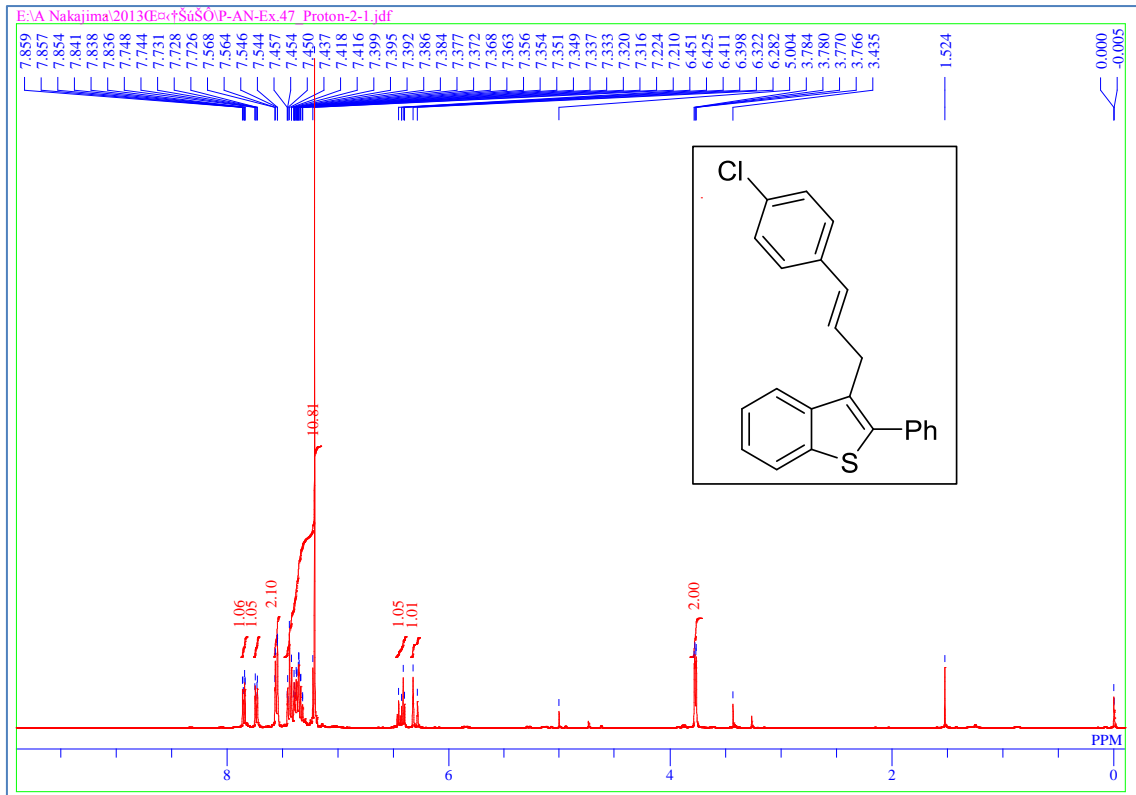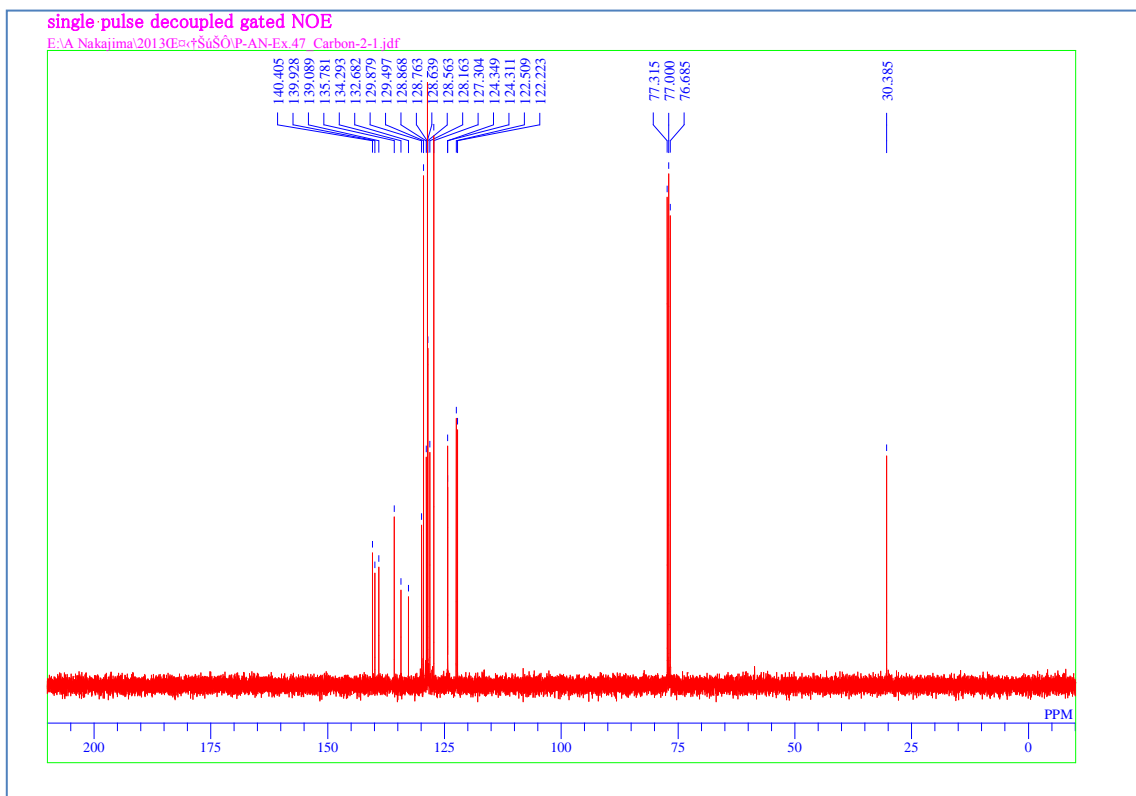

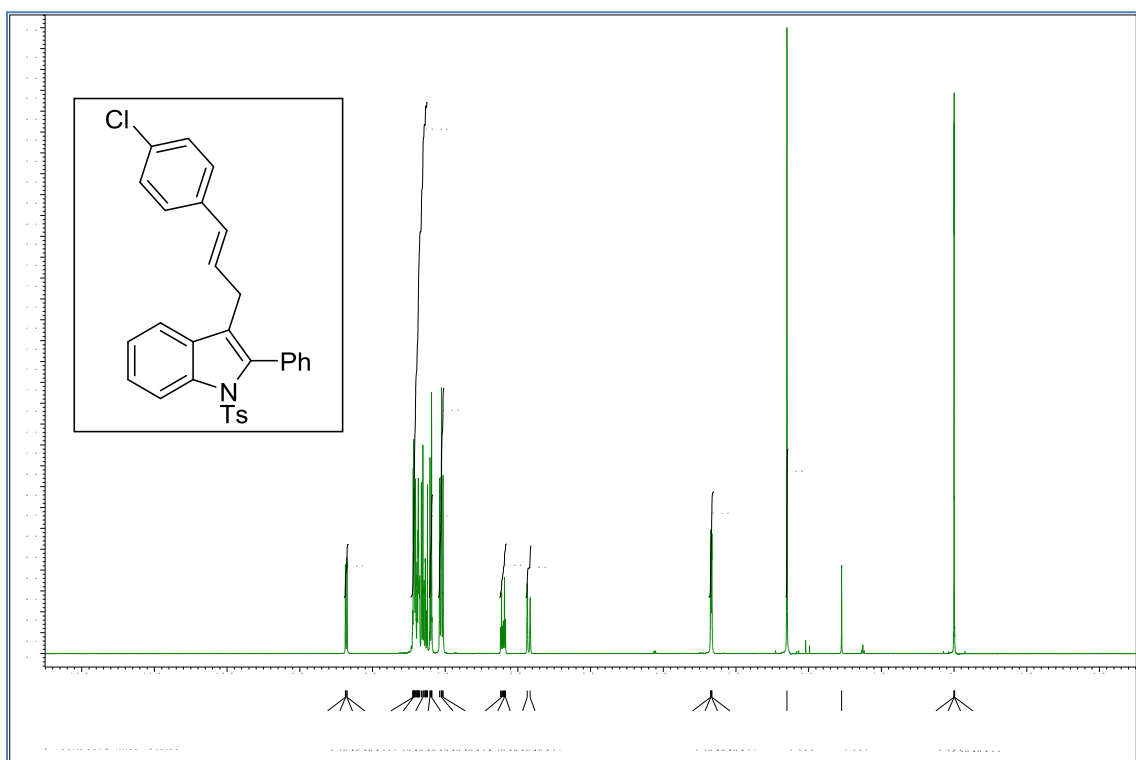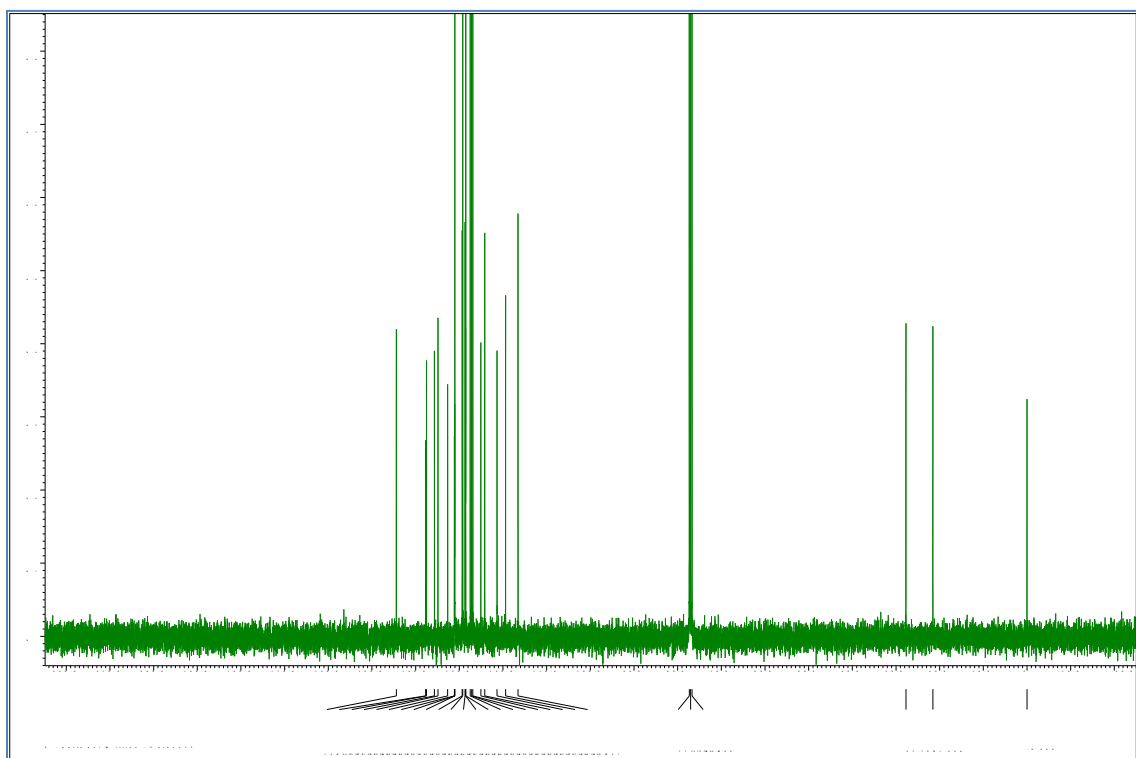

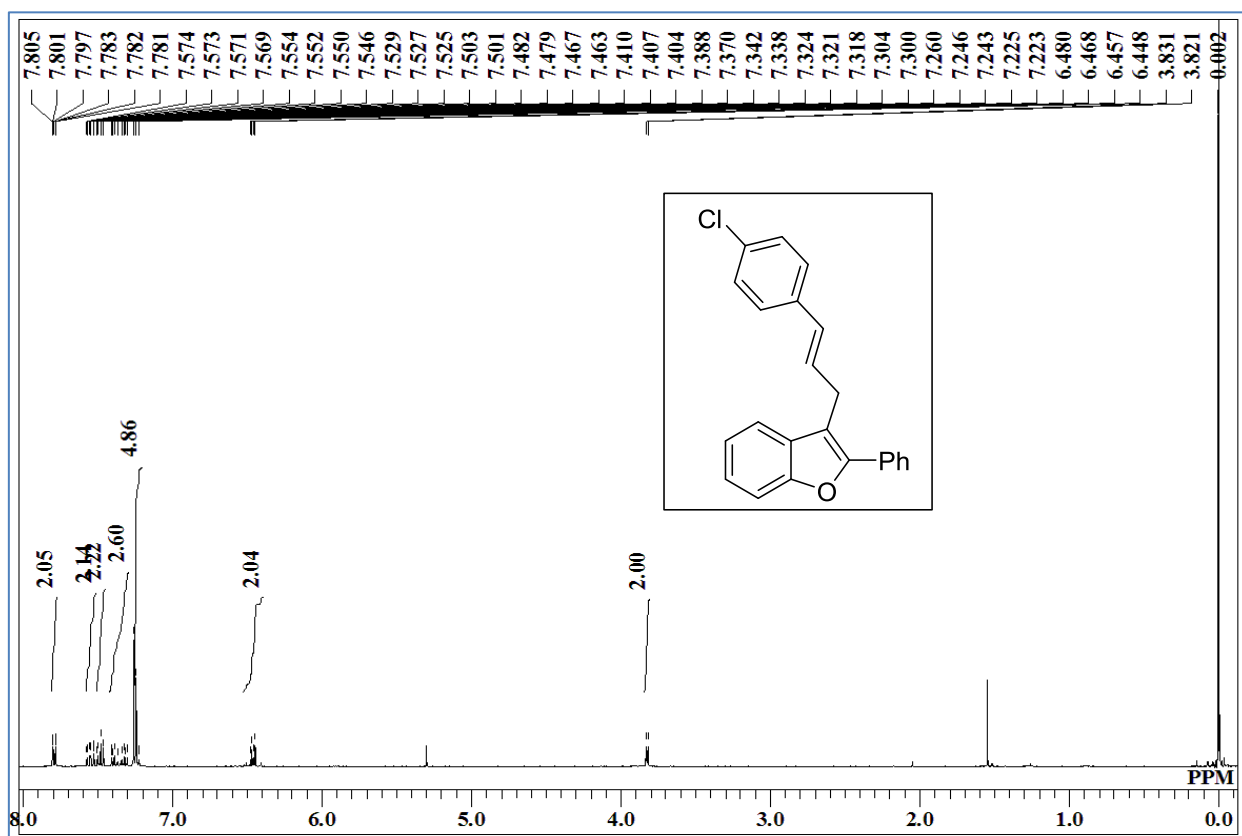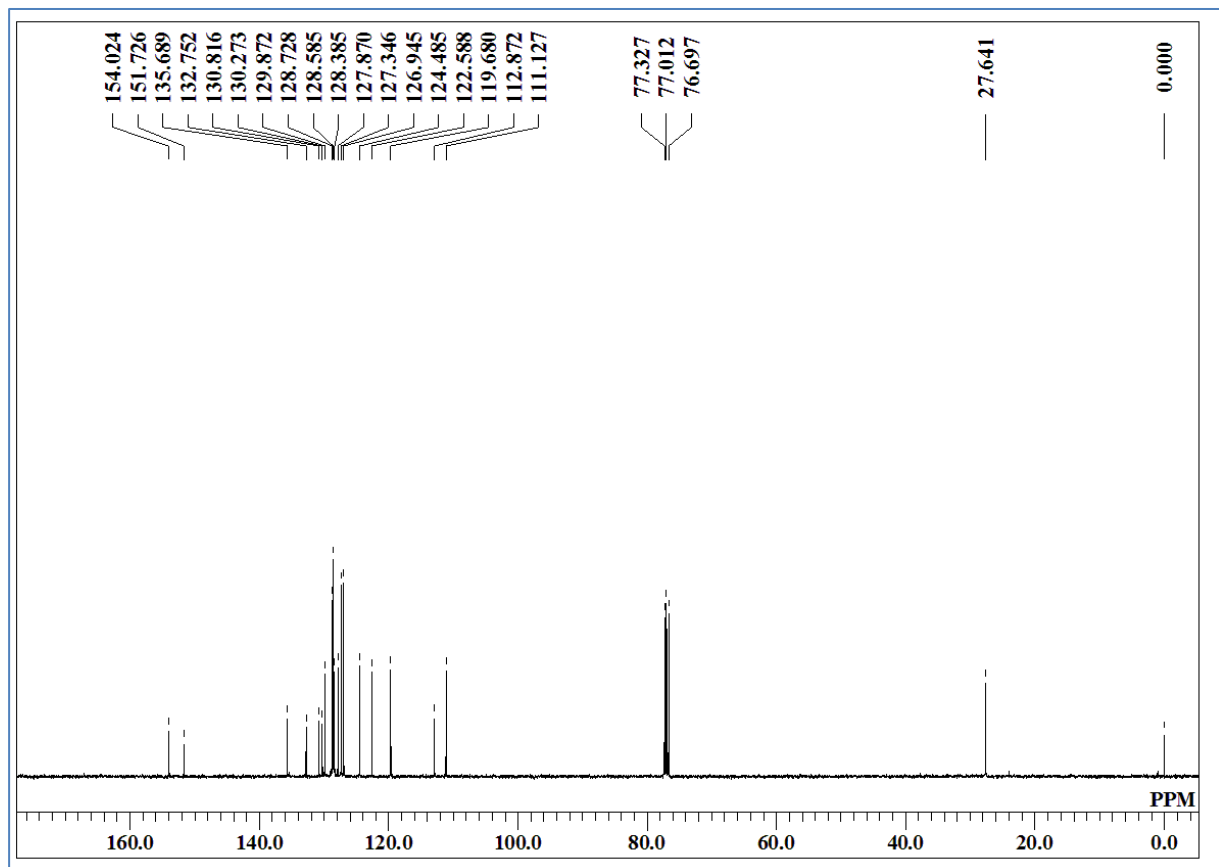

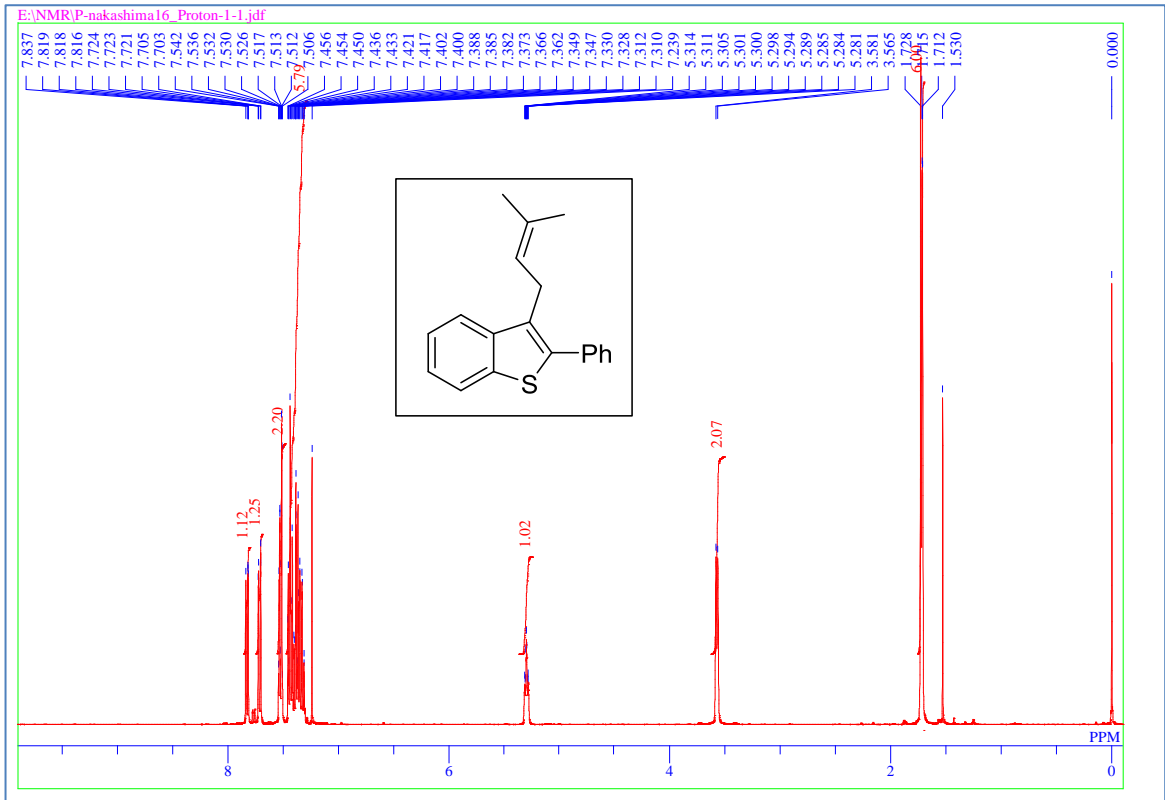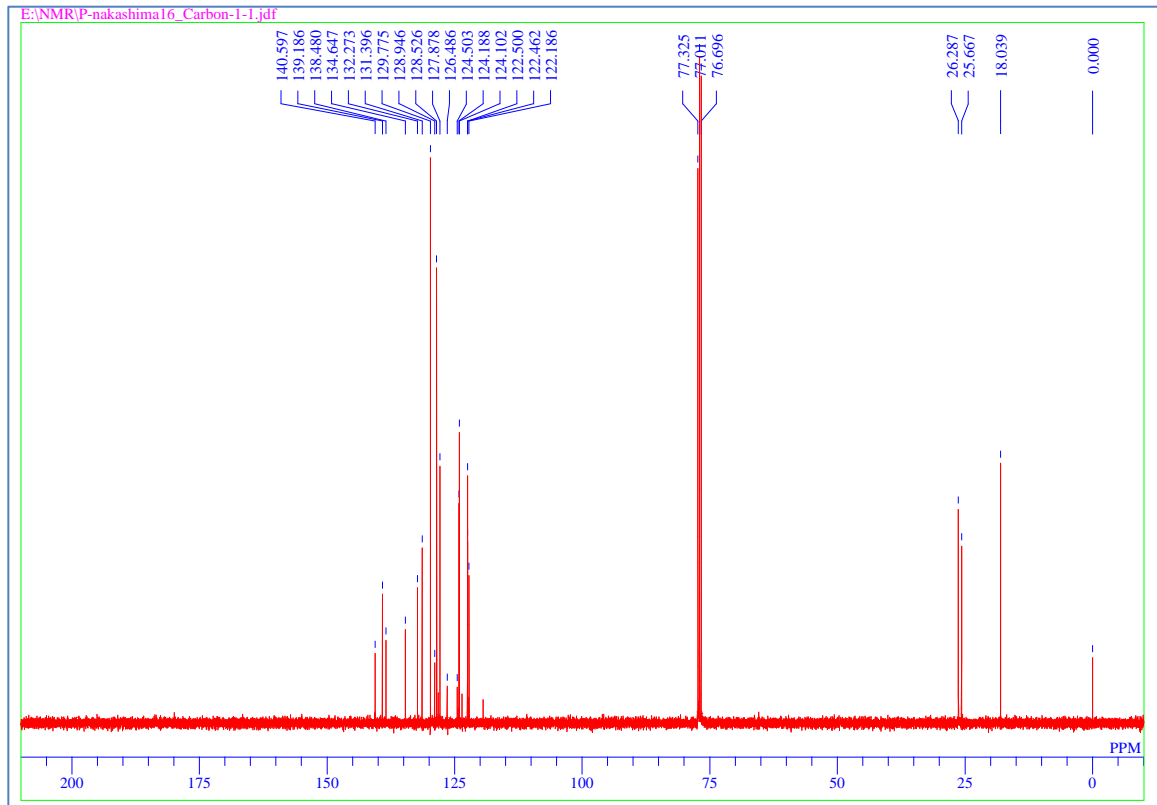

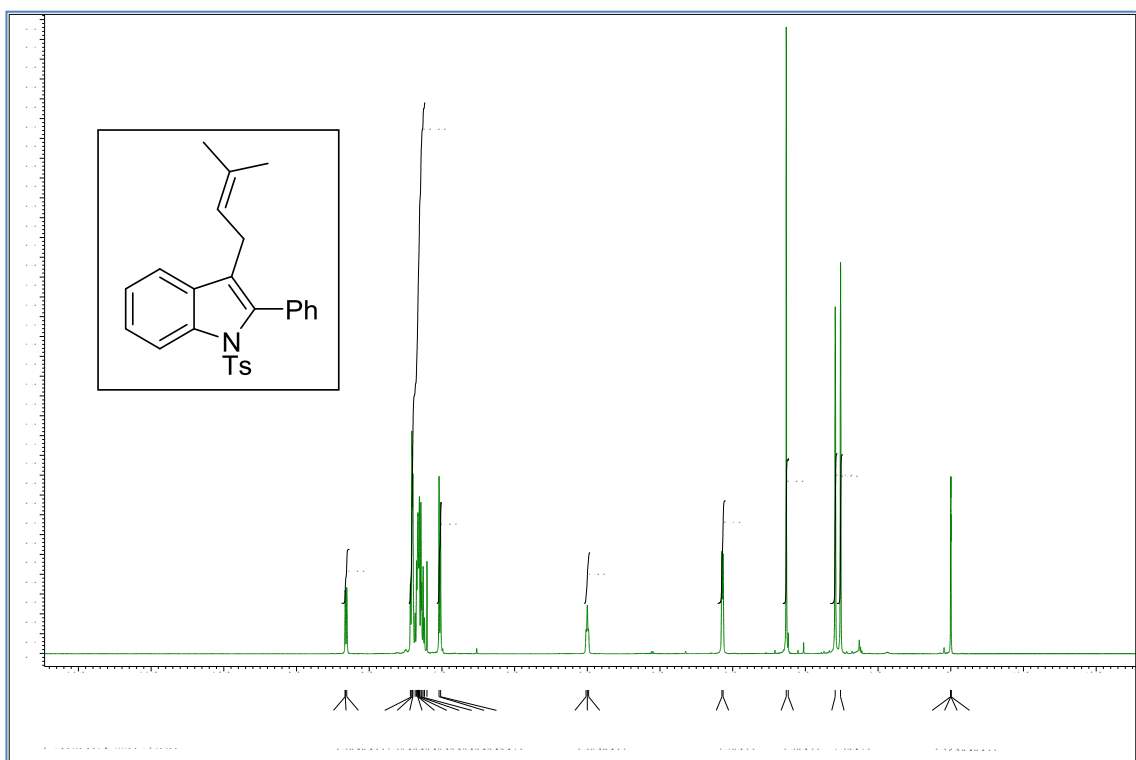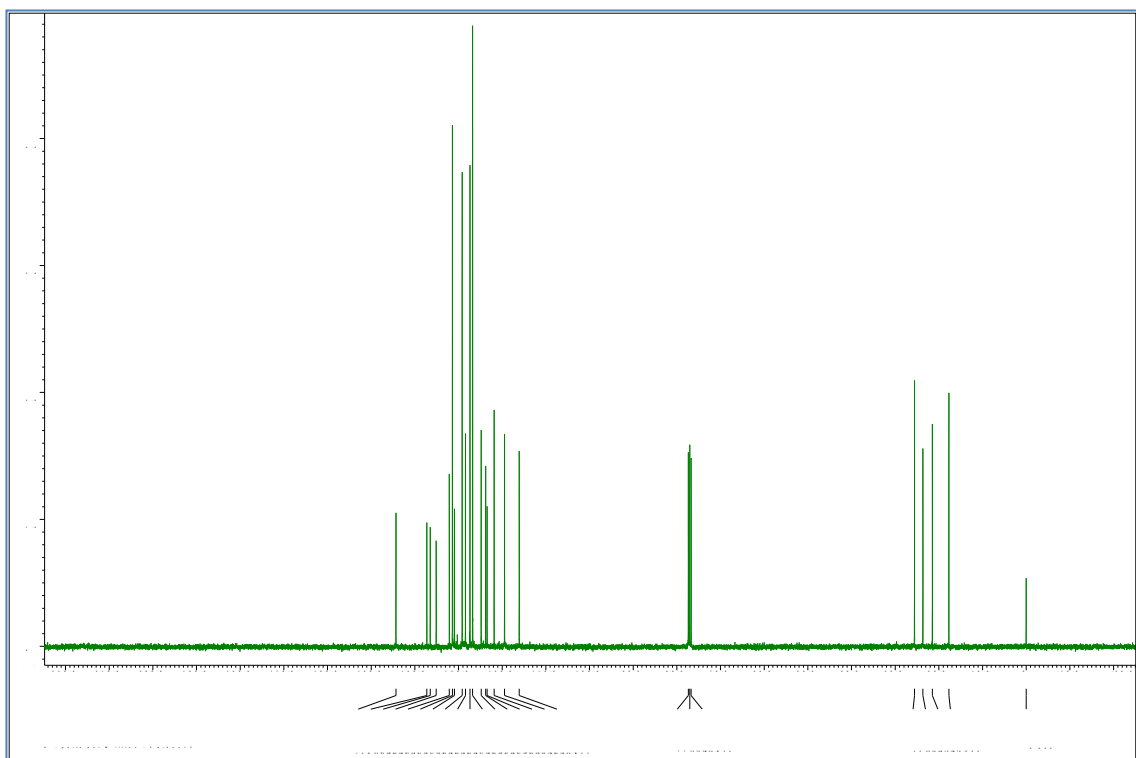

single\_pulse

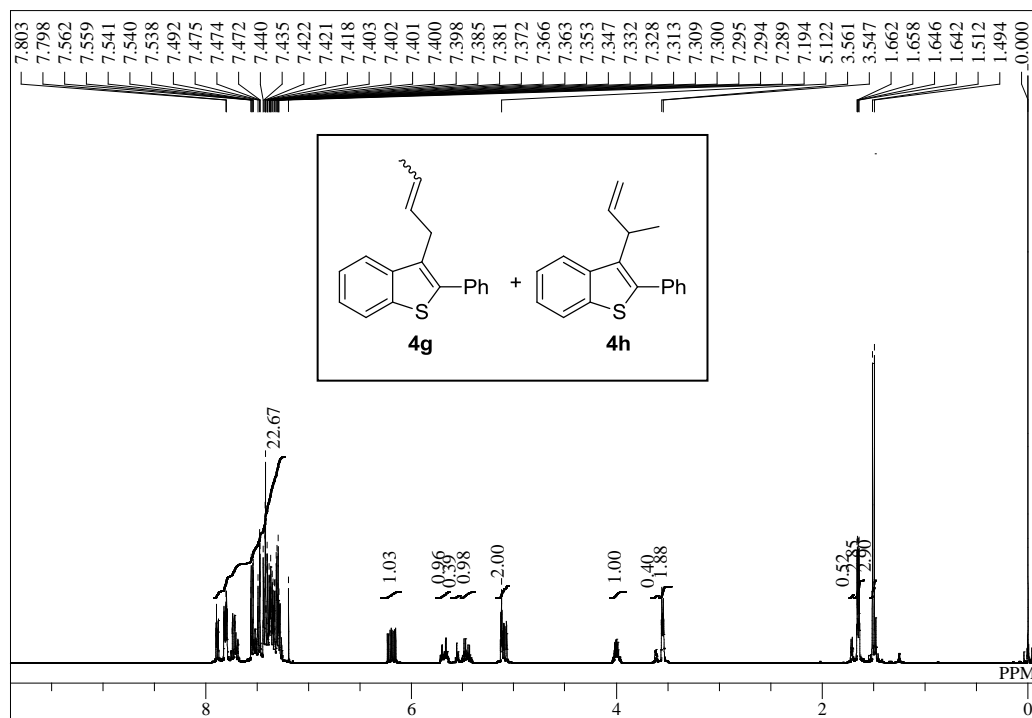

single\_pulse decoupled gated NOE

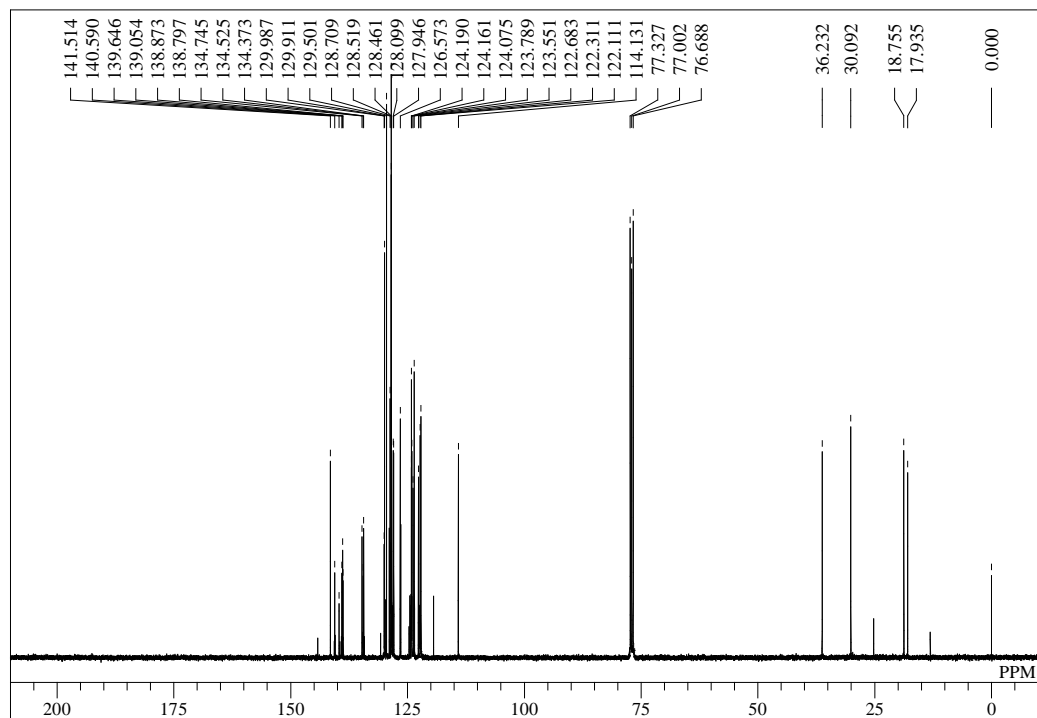



Enlarged NMR spectra of **4g** and **4h**

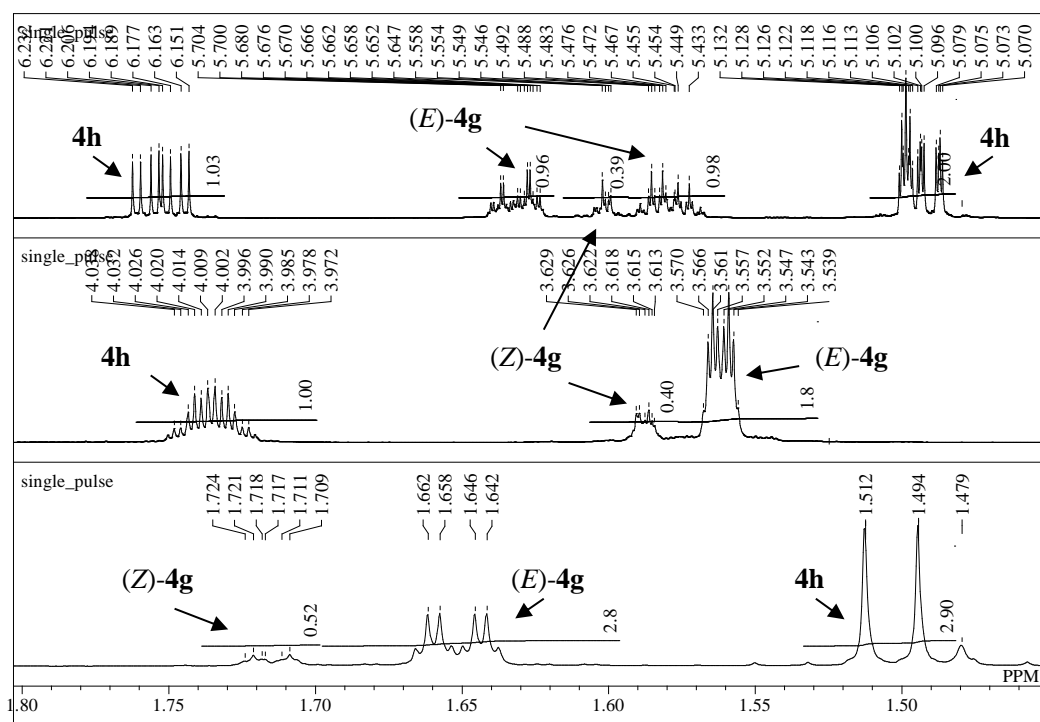

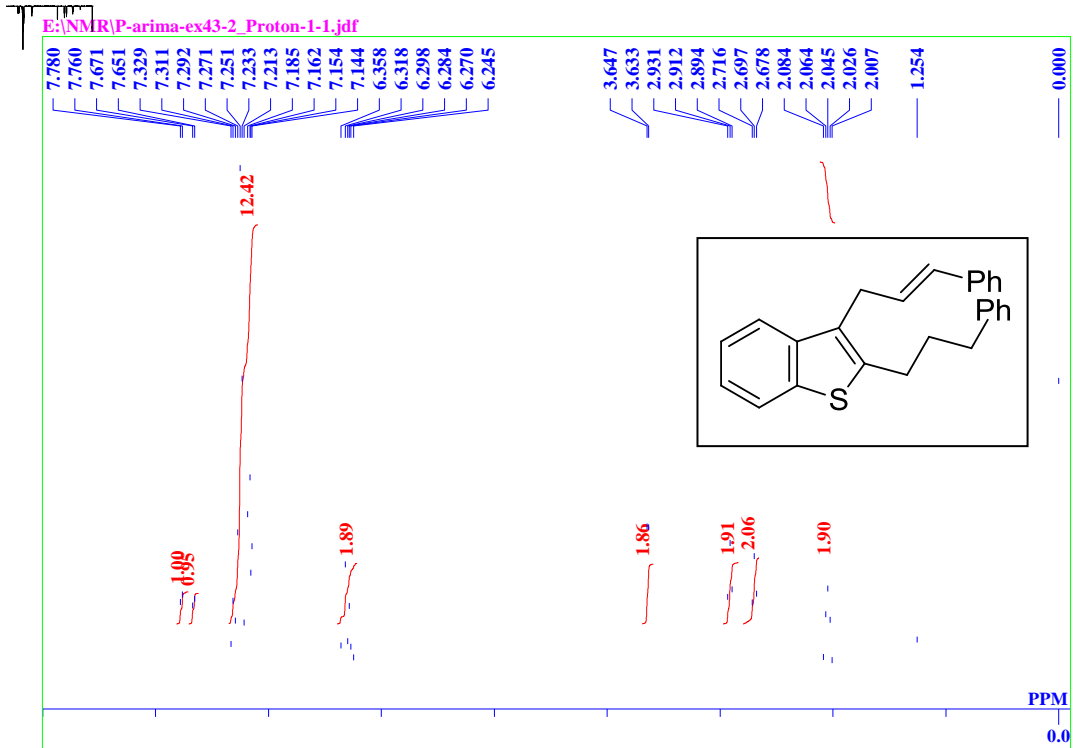

single pulse decoupled gated NOE

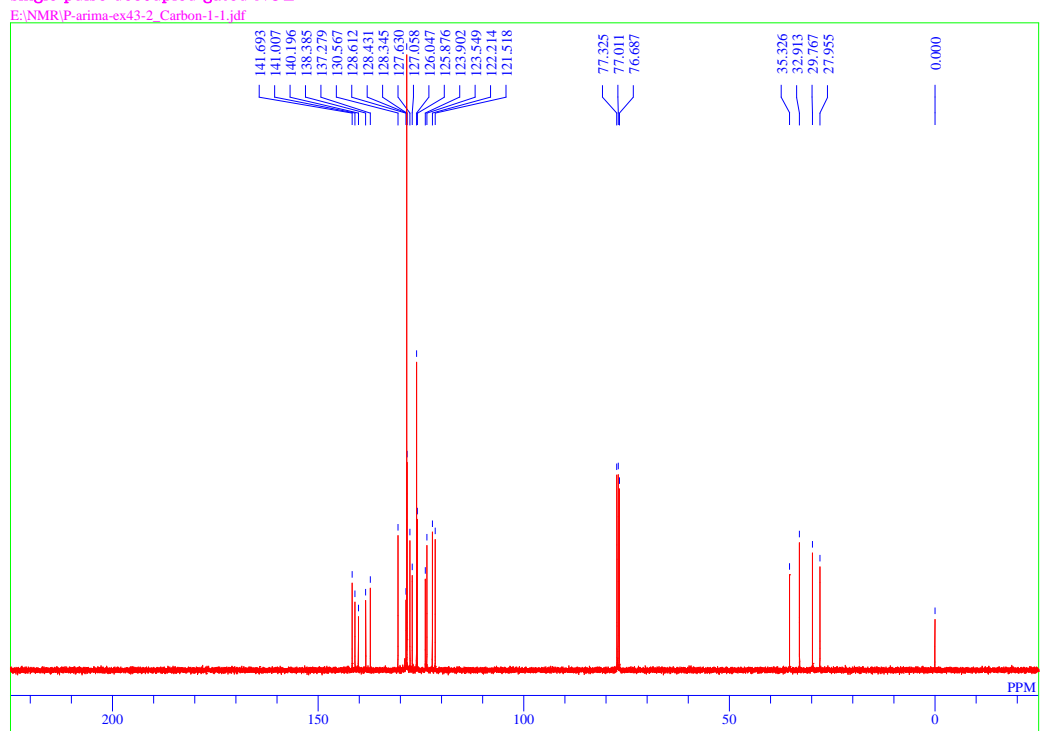

single\_pulse

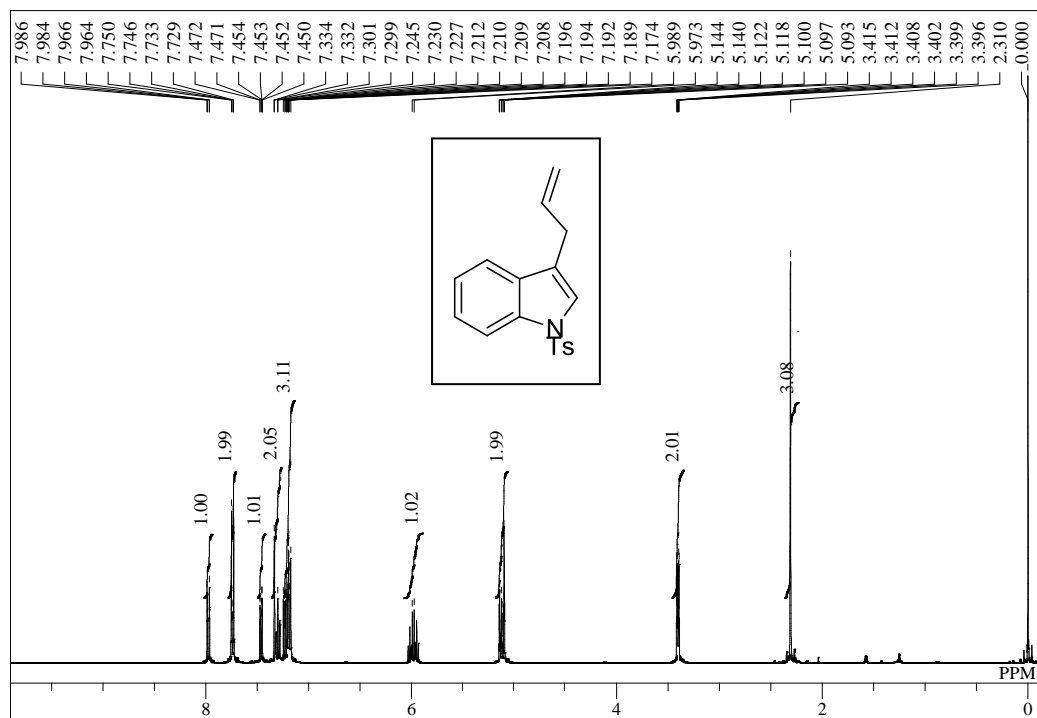

single\_pulse decoupled gated NOE

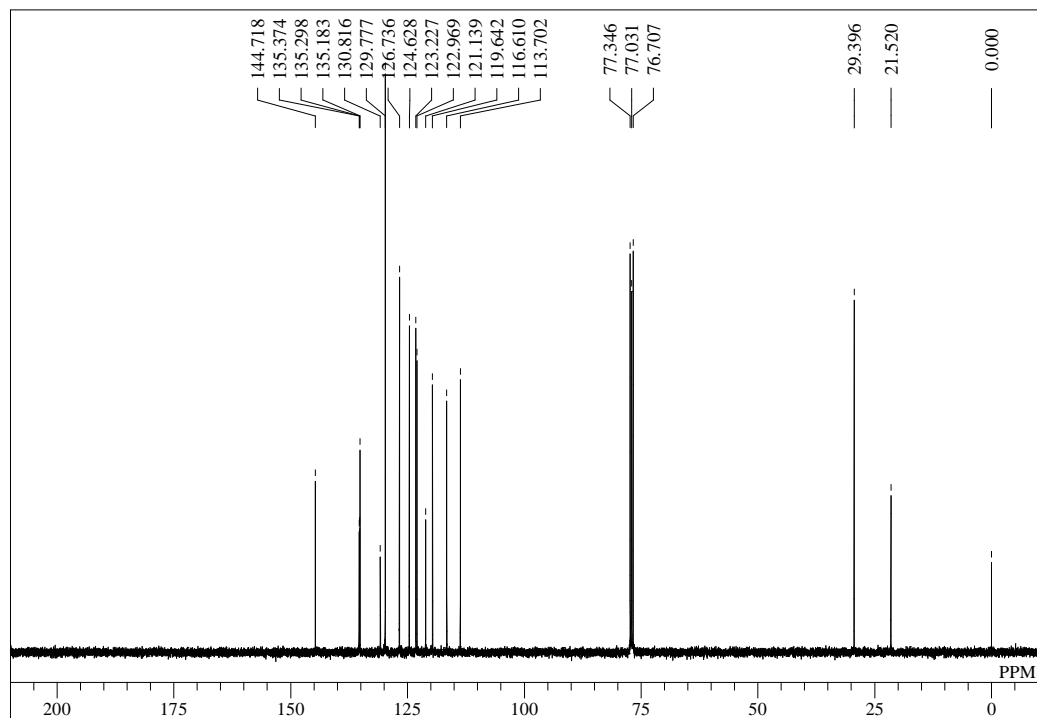

single\_pulse

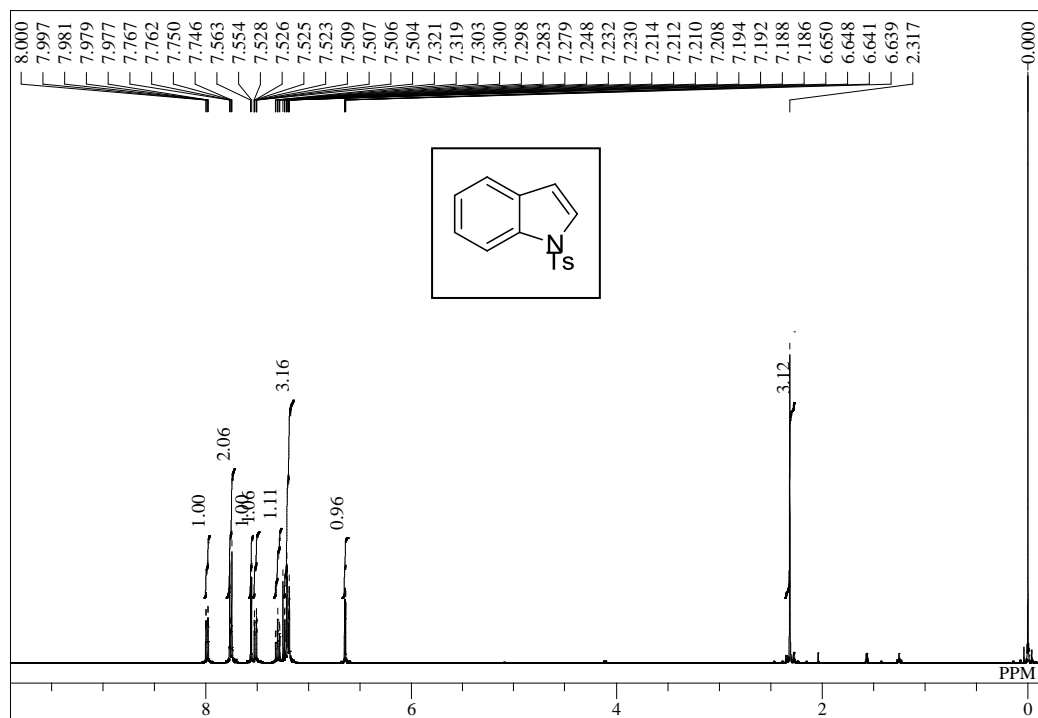

single pulse decoupled gated NOE

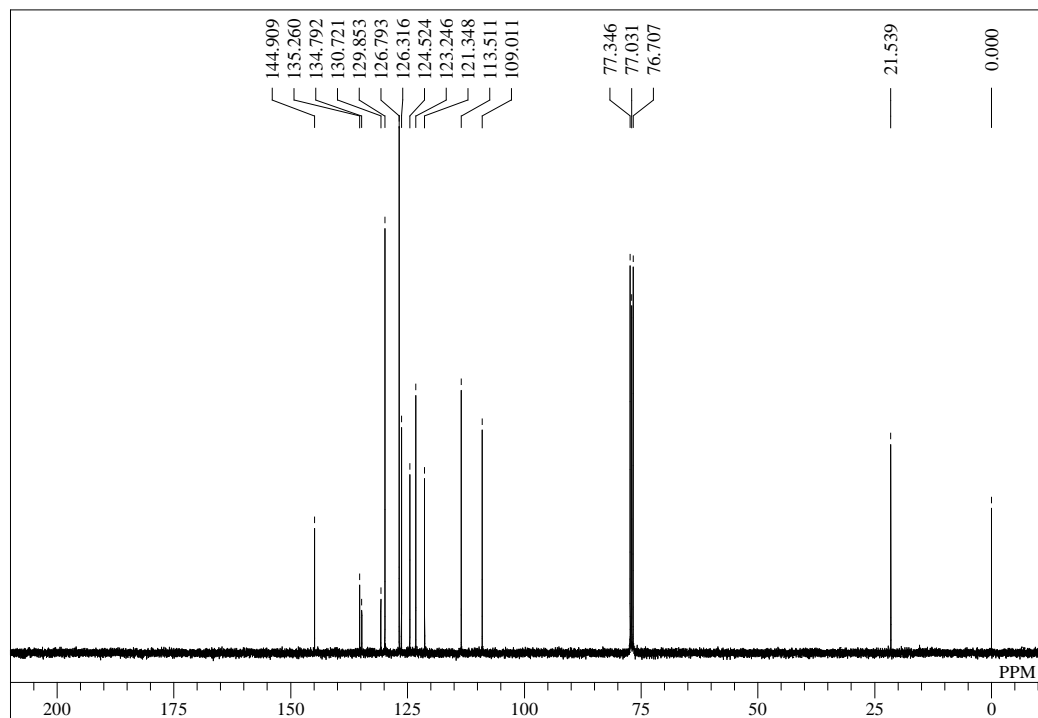

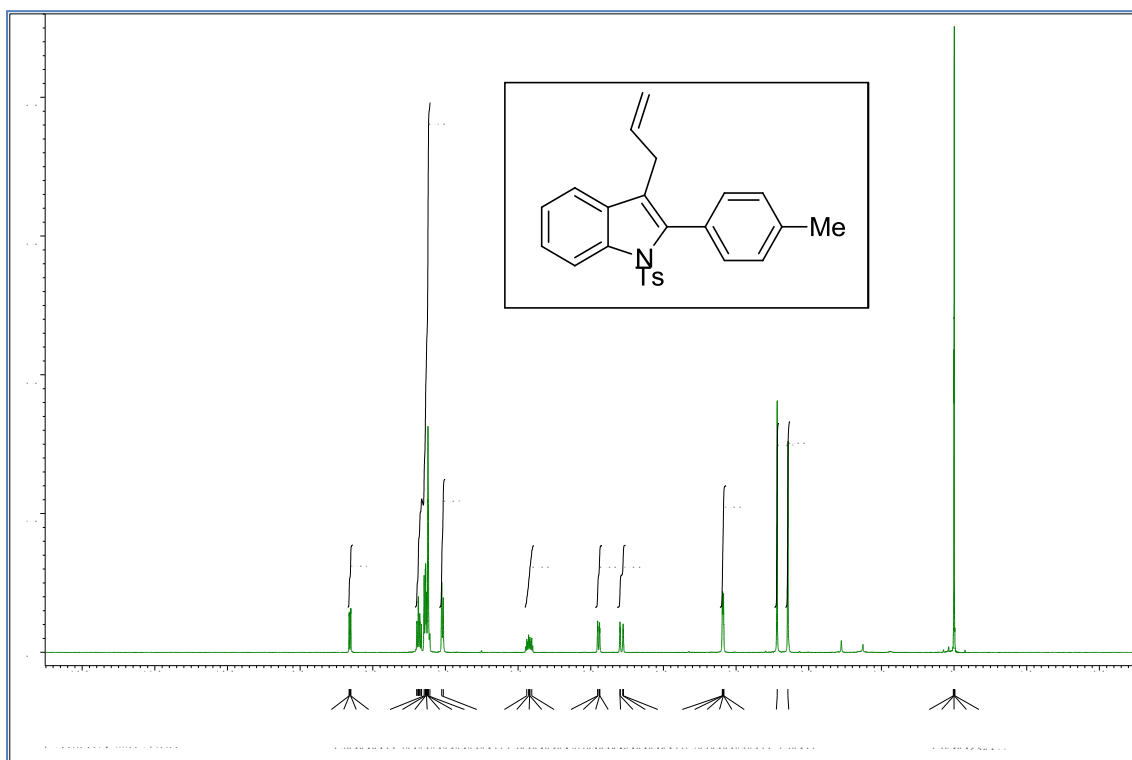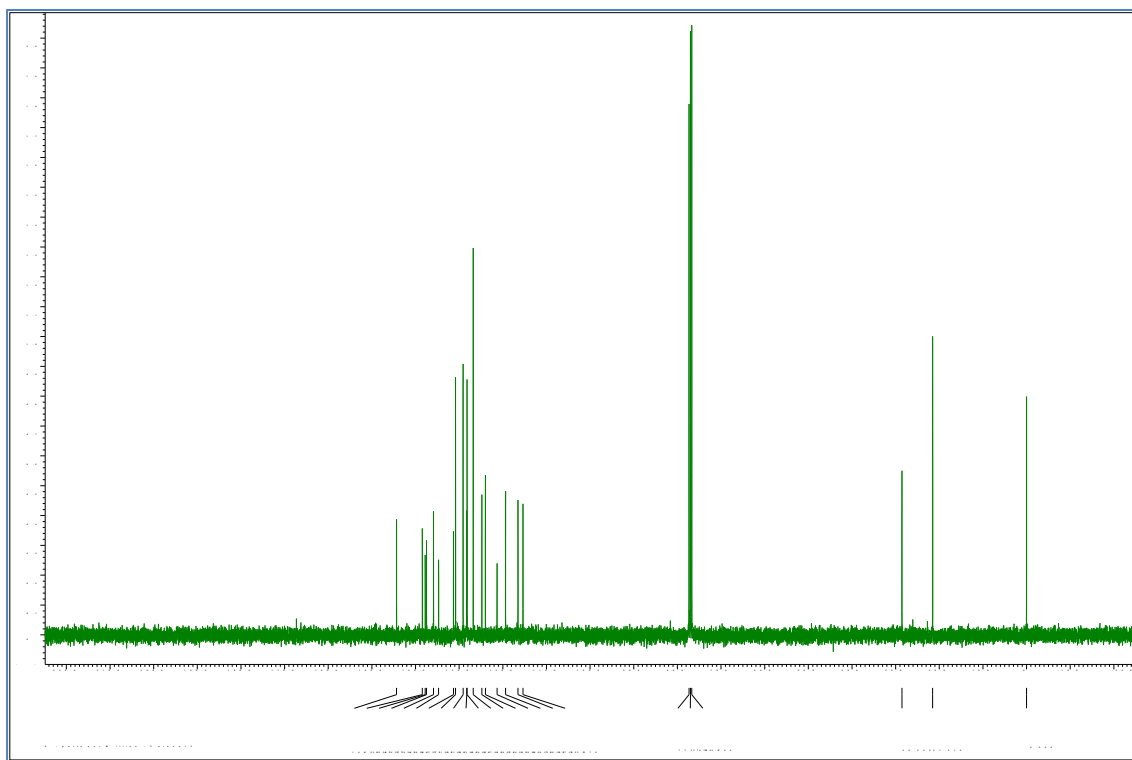

Supplement: c5ra05263g1.pdf [file c5ra05263g1.pdf]
